# Supplementary material for: Breaking epigenetic shackles: targeting ARID1A methylation and the PI3K/AKT/mTOR-PD-L1 axis to overcome immune escape in gastric cancer
Source: PeerJ journal article supplement (doi:10.7717/peerj.20251), 2025-11-06

# 1.Primary Western Blot data

Figure7C

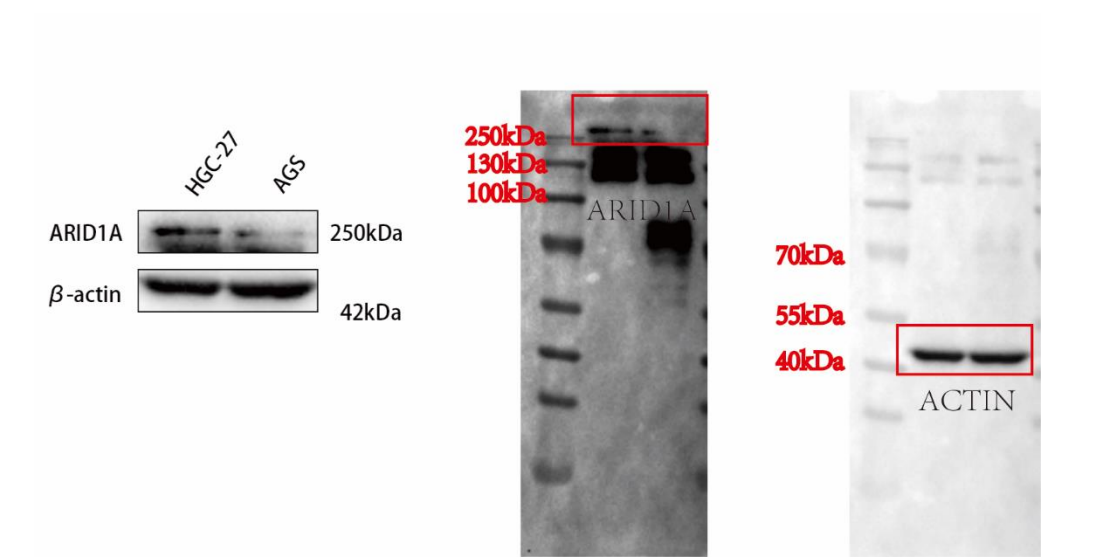

Figure7I

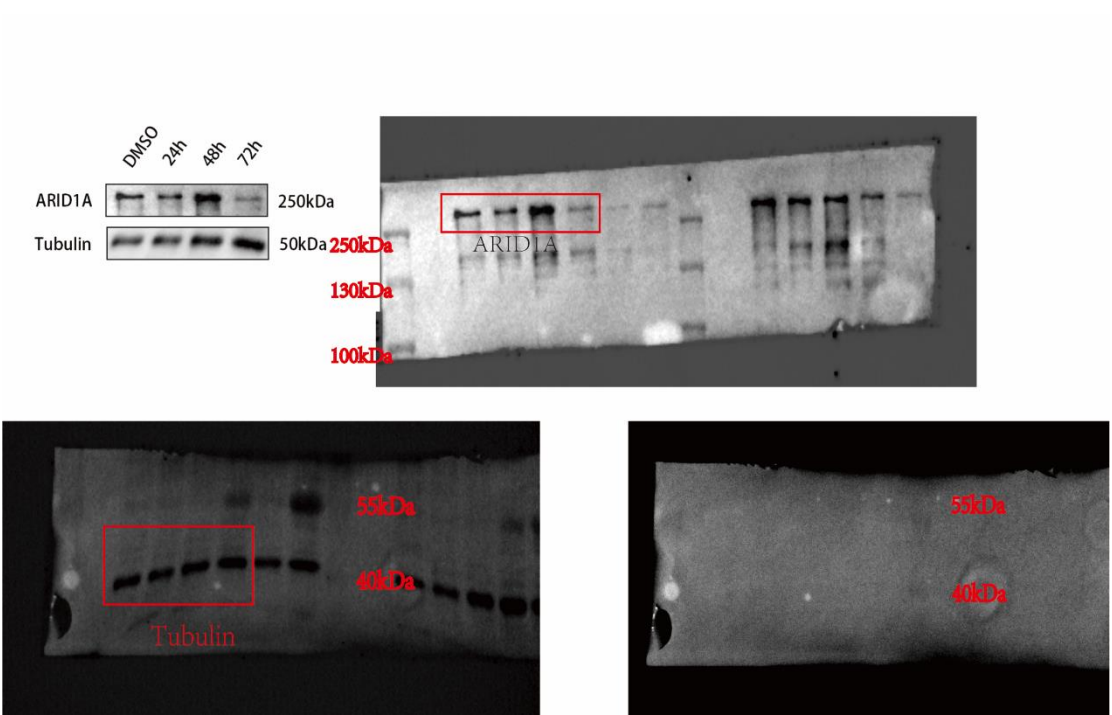

# Figure8A& FigureS5A

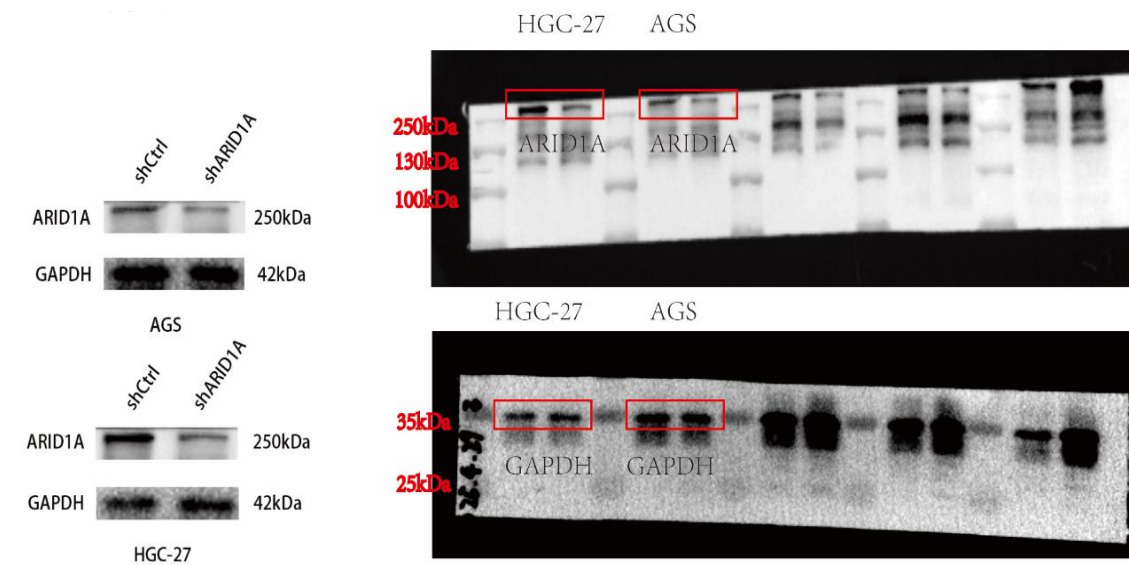

Figure10A& FigureS6A

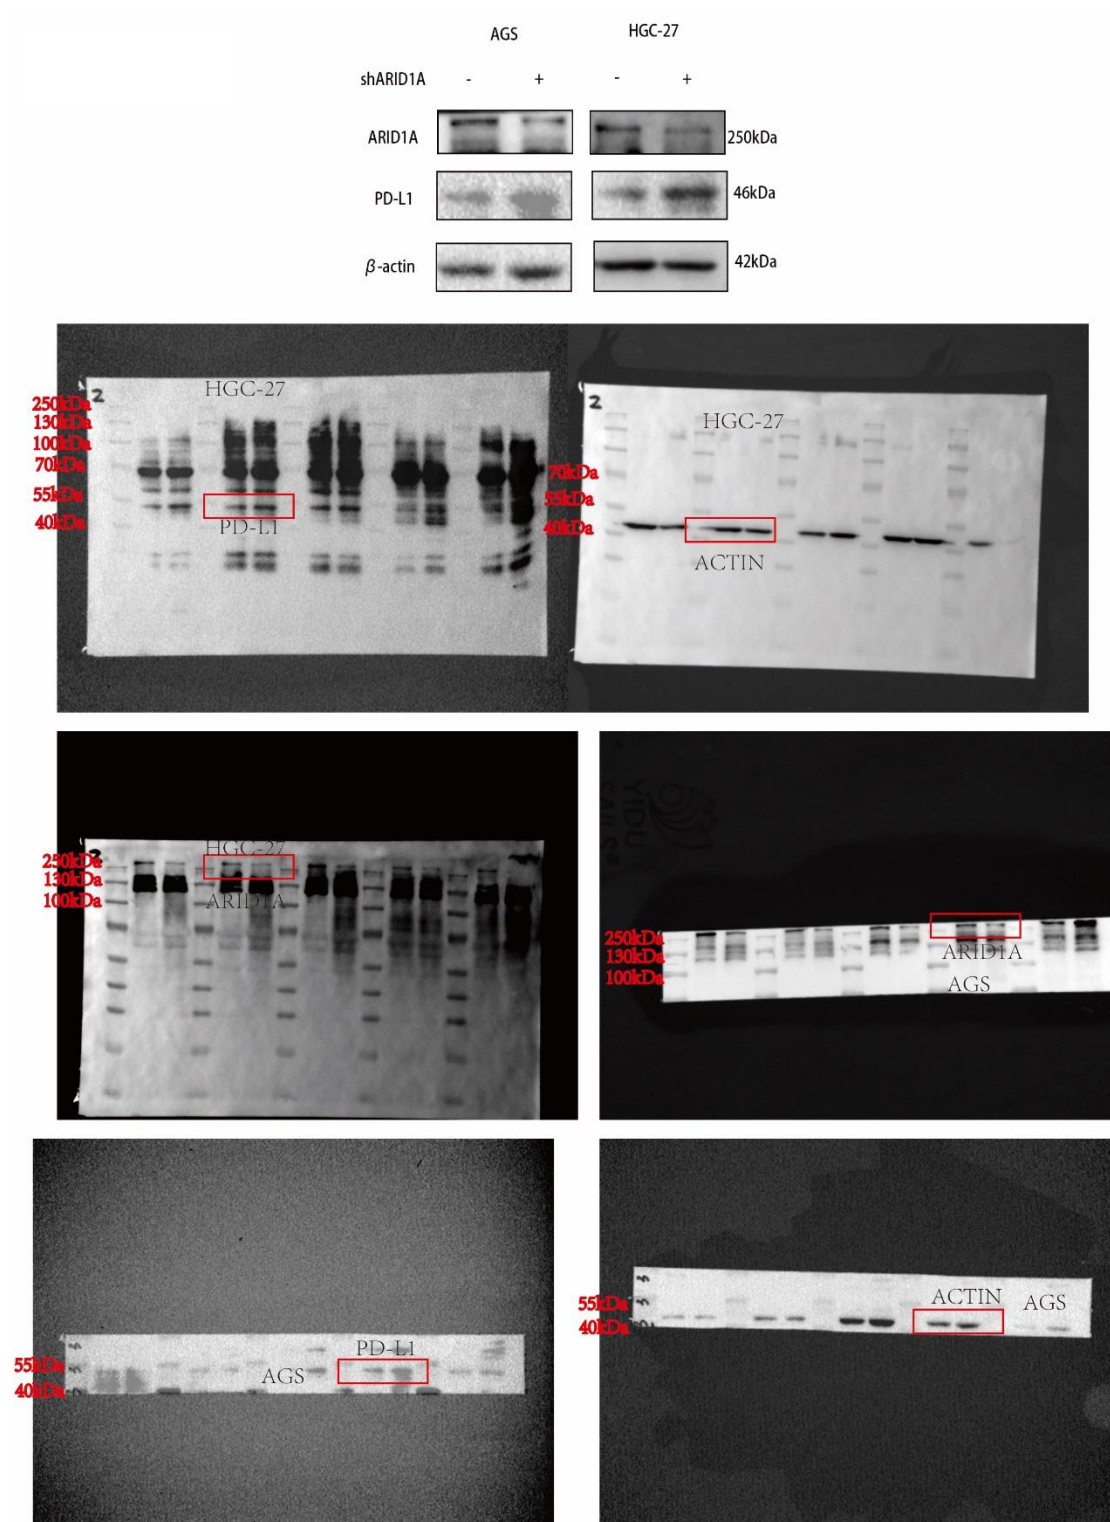

Figure10D

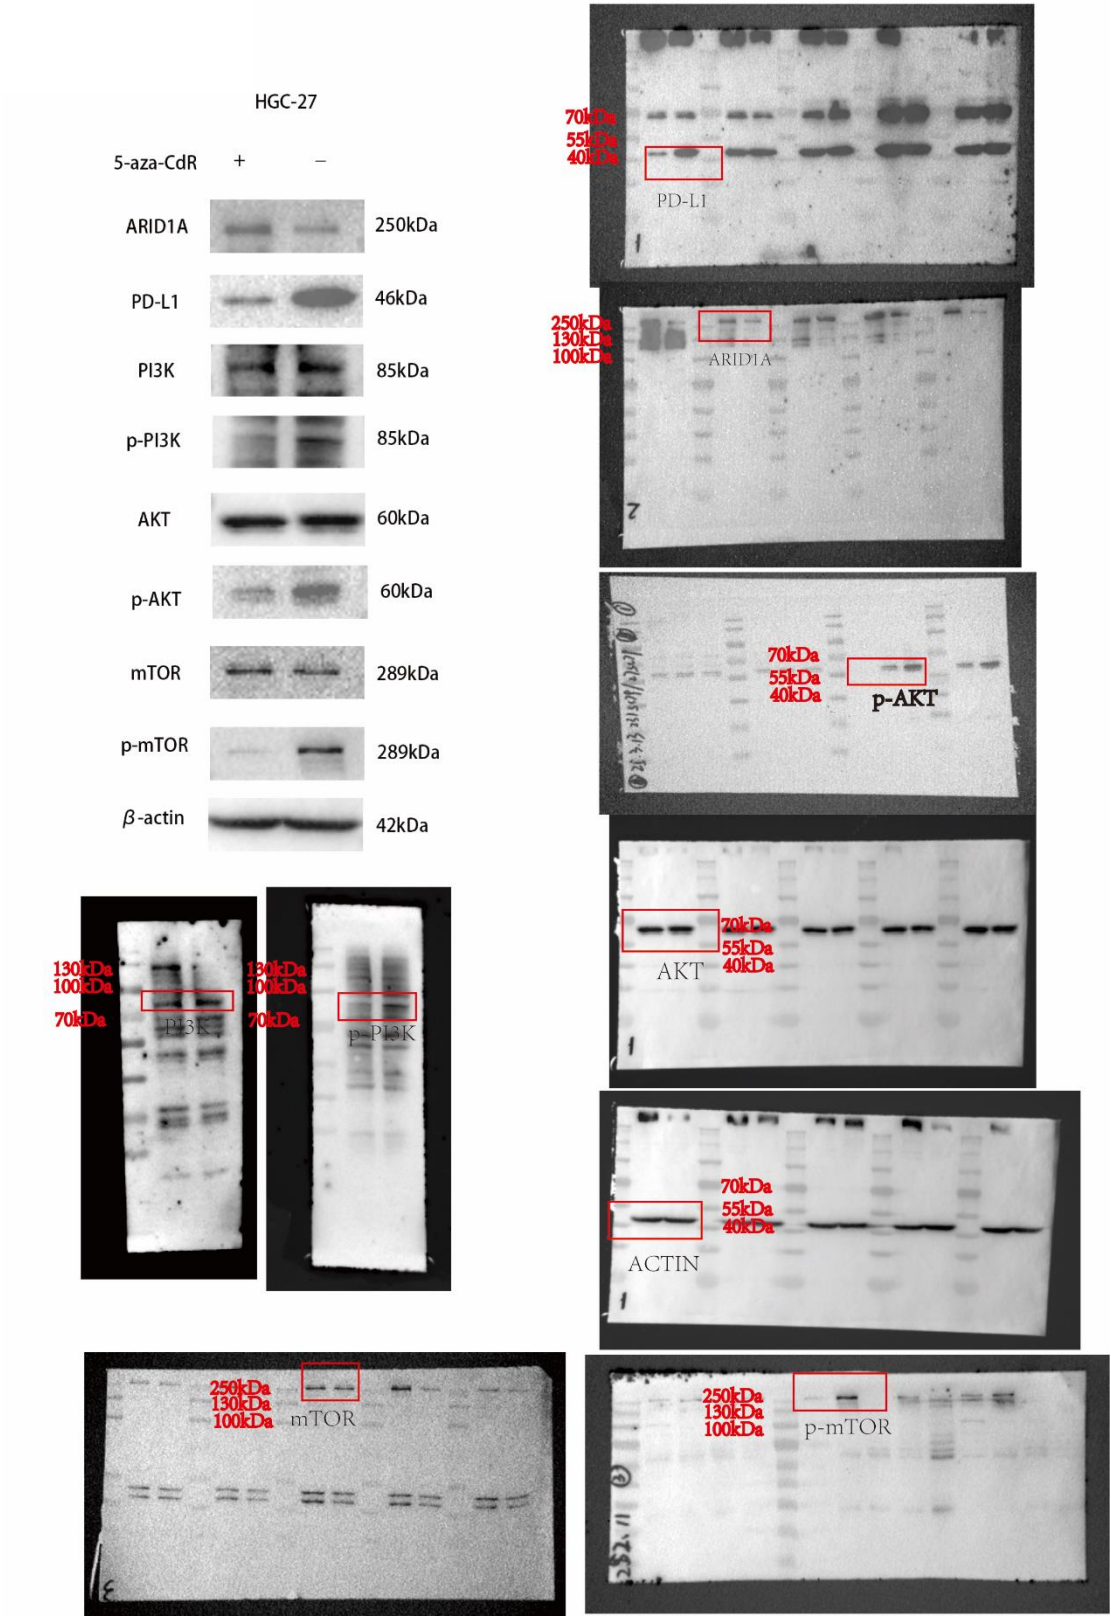



Figure 10M

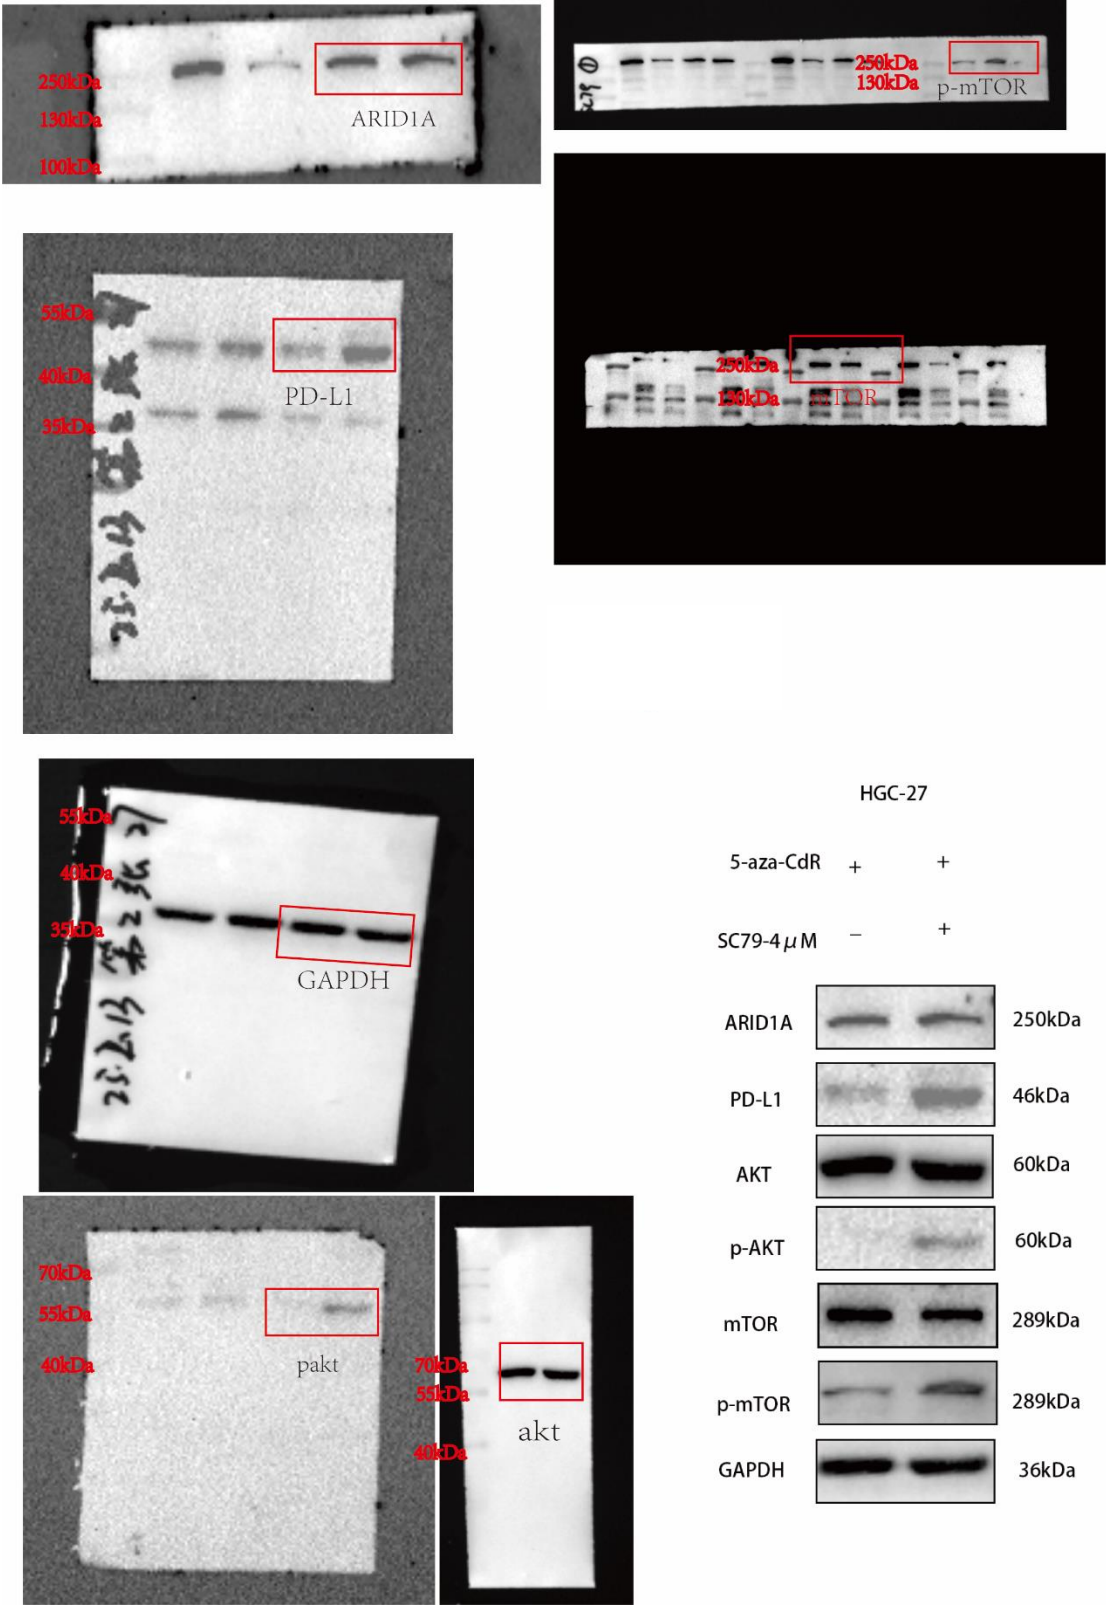

Figure10T

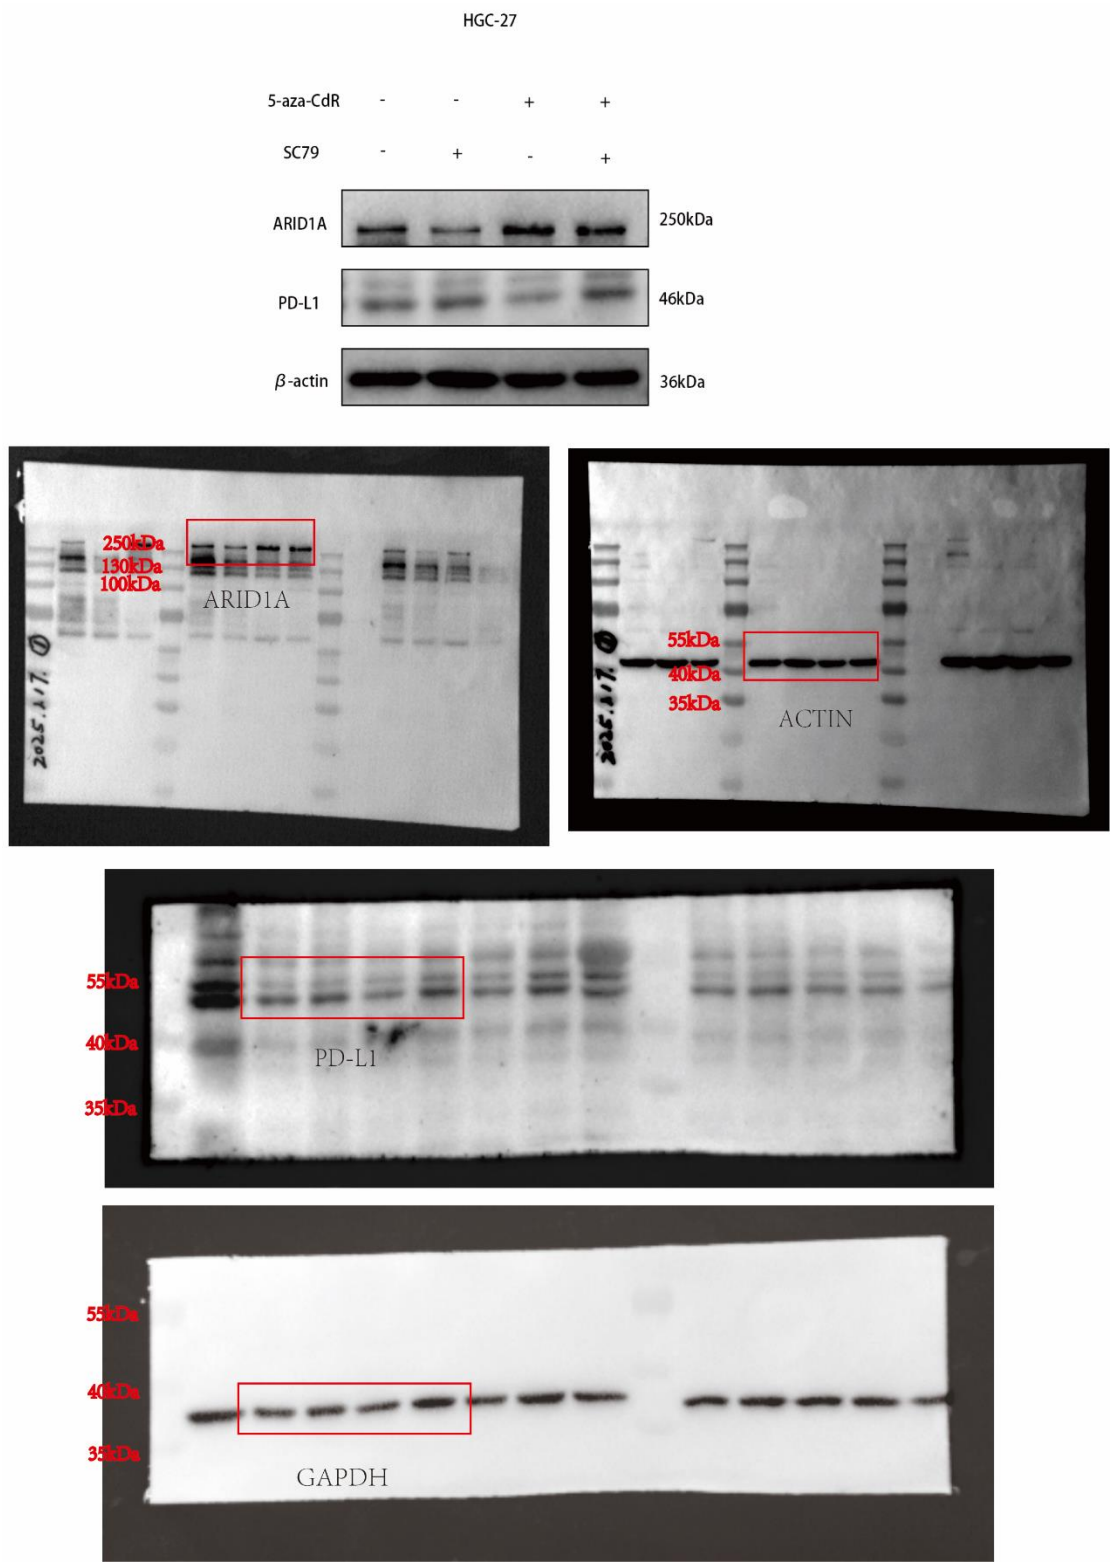

## 2.Original Images for Gels

Figure7B

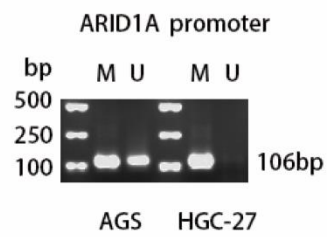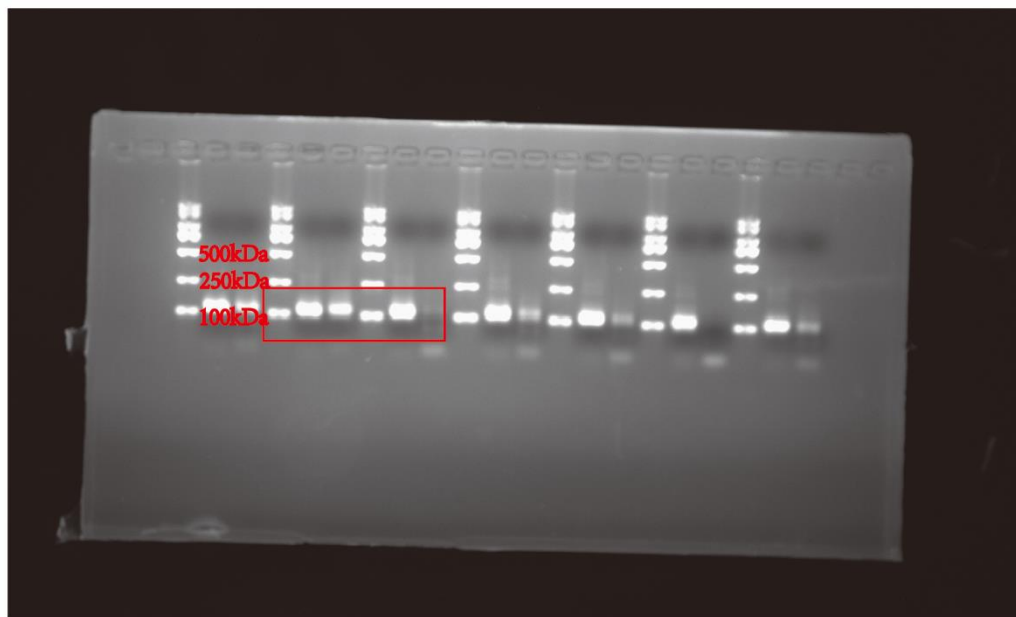

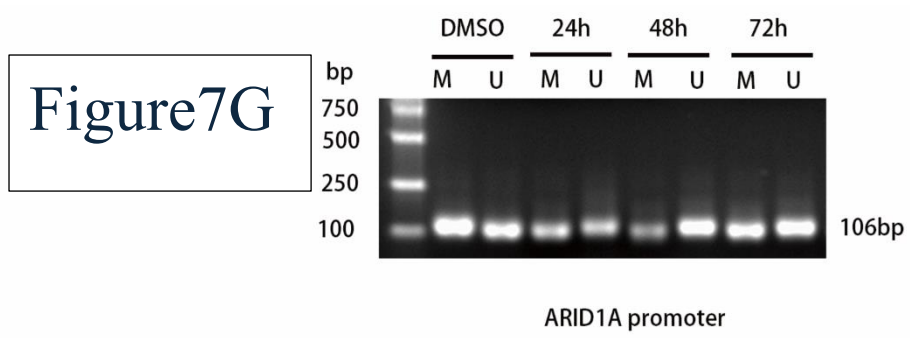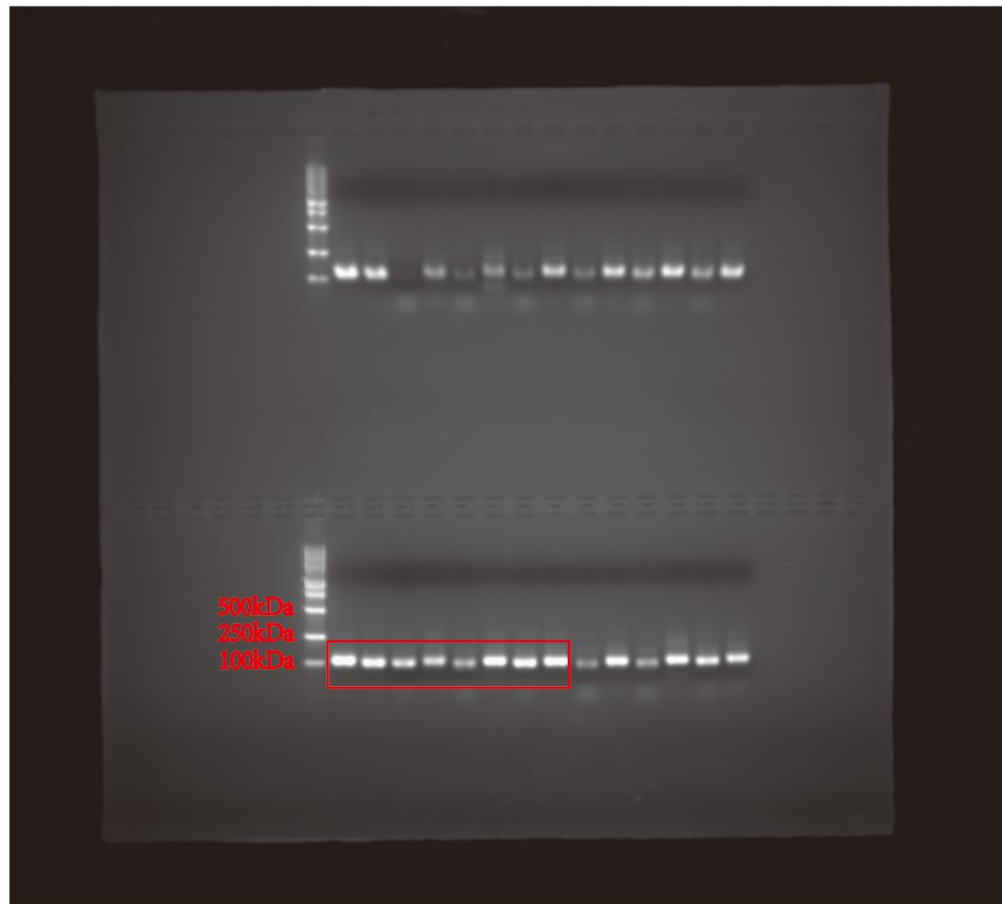



### 3.Original Images for Microscopy

Figure S5E

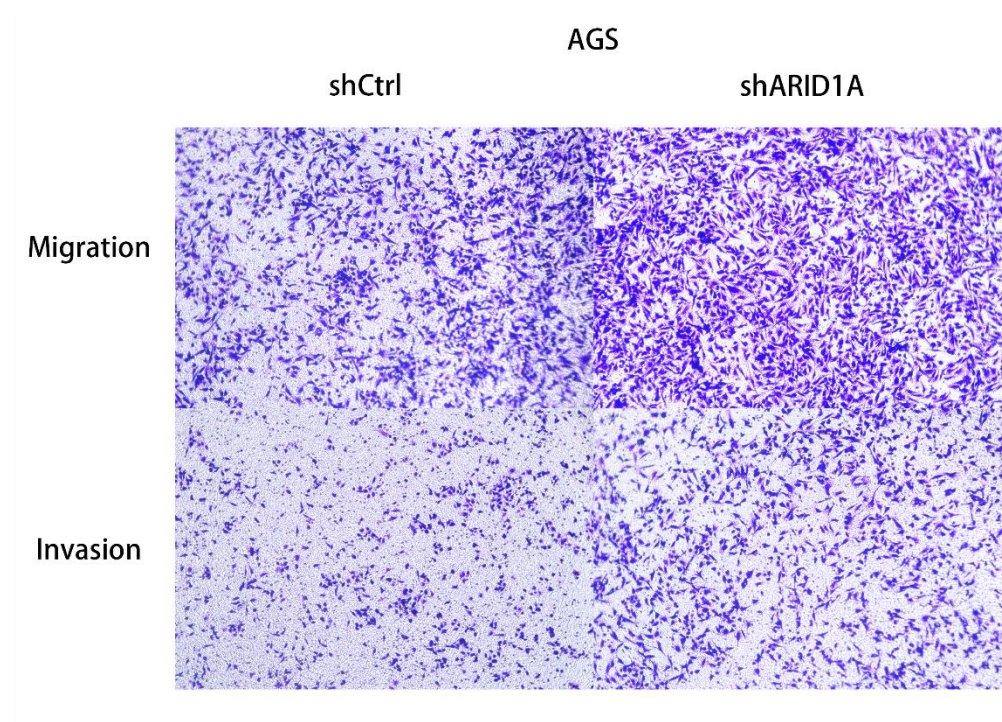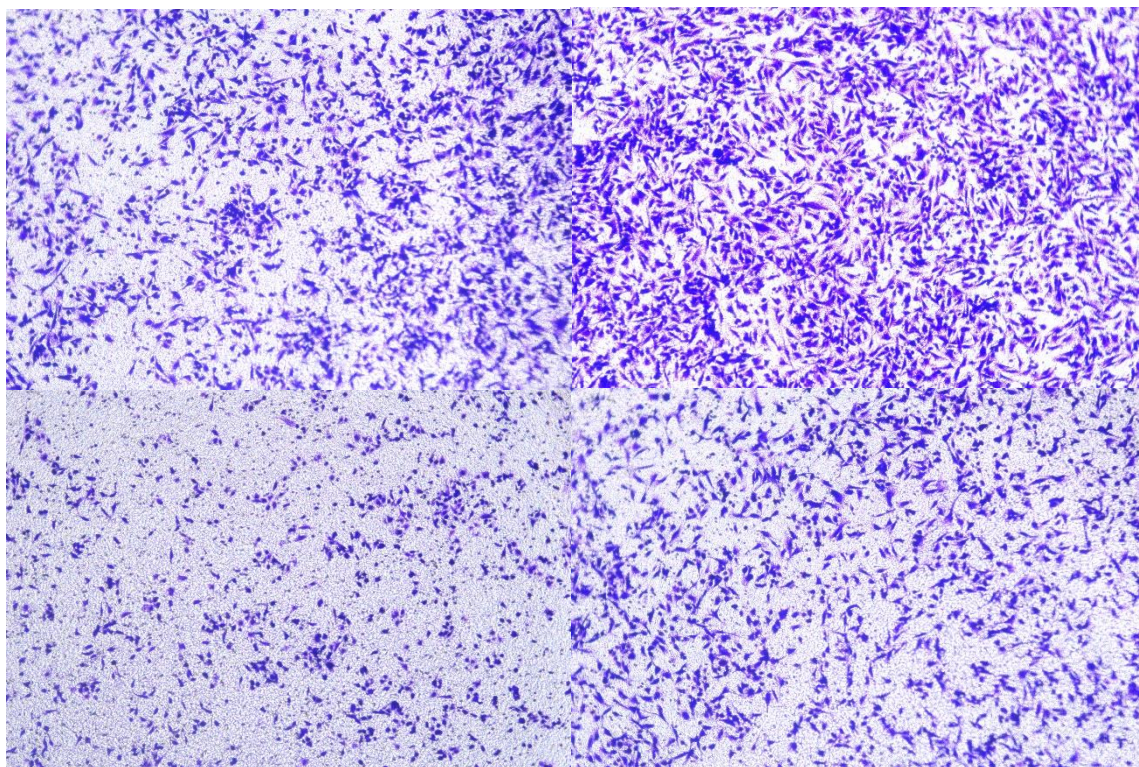



Fig-8E

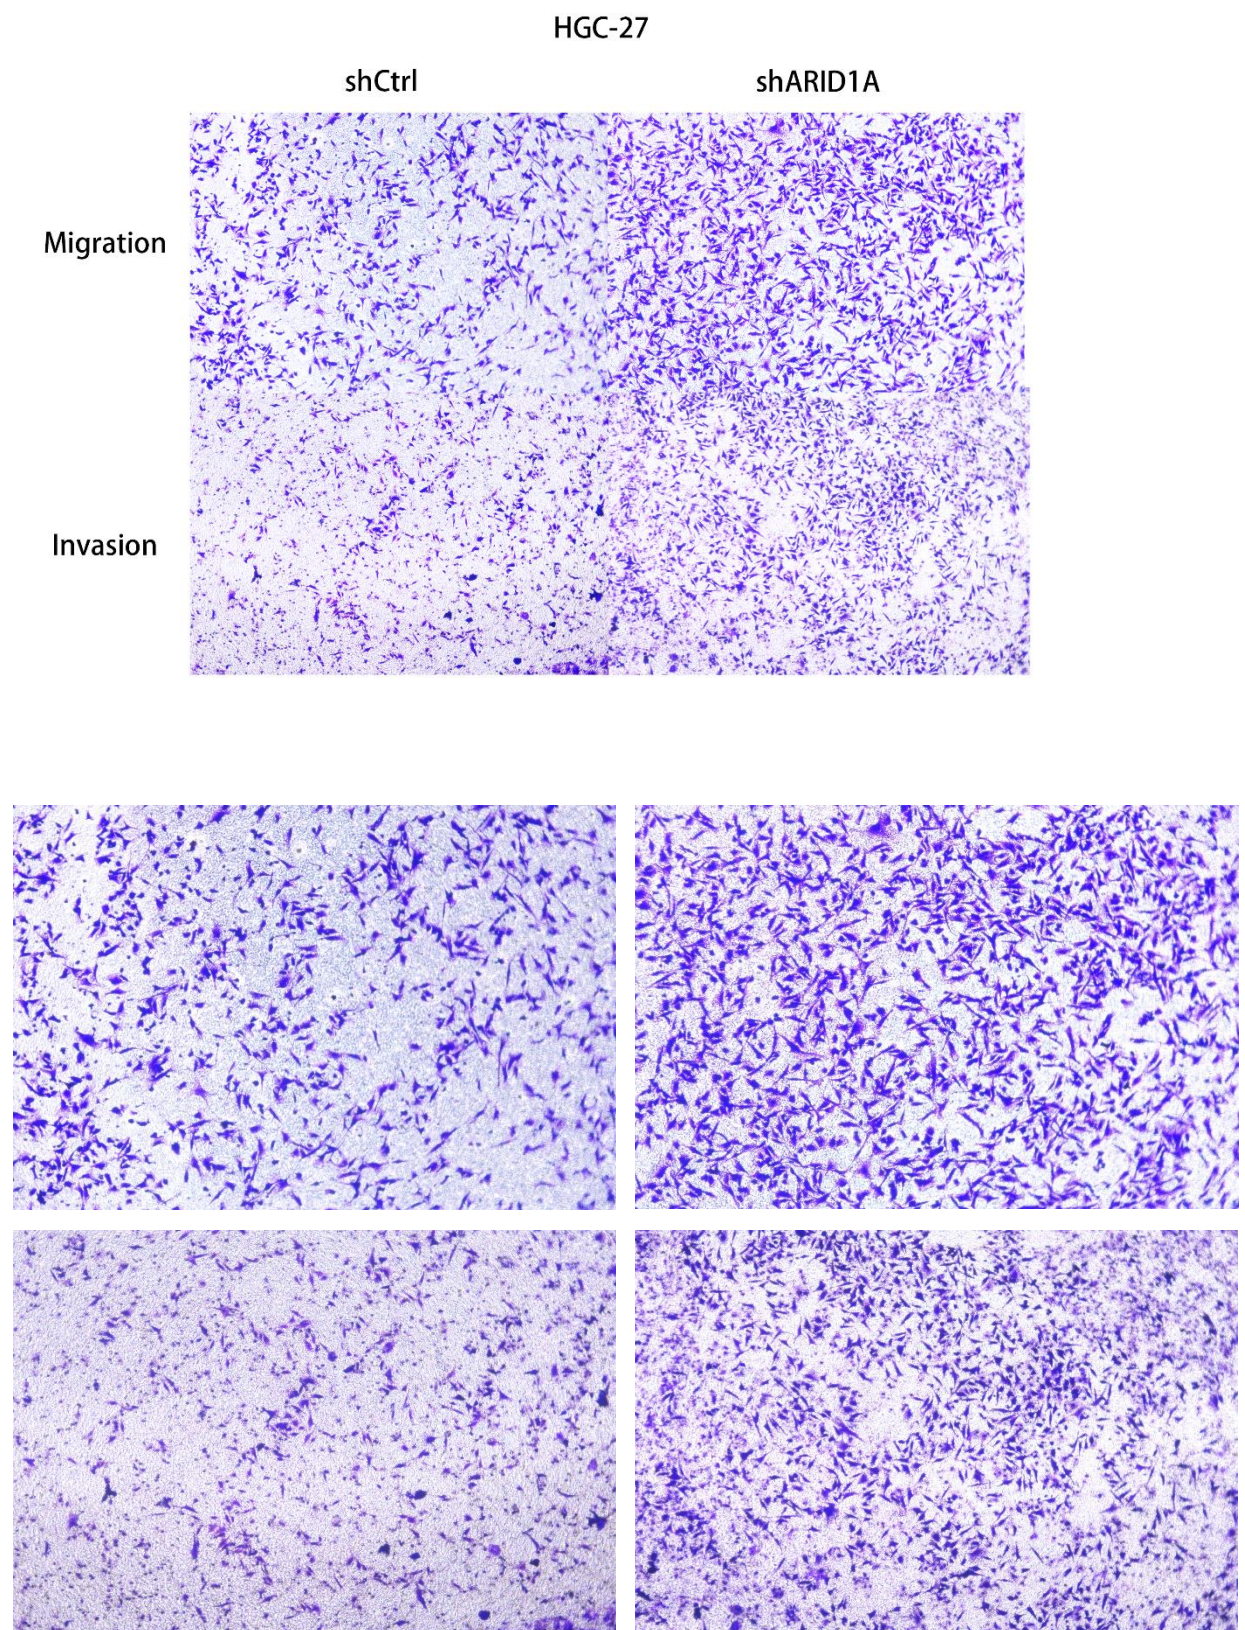



Figure S5H

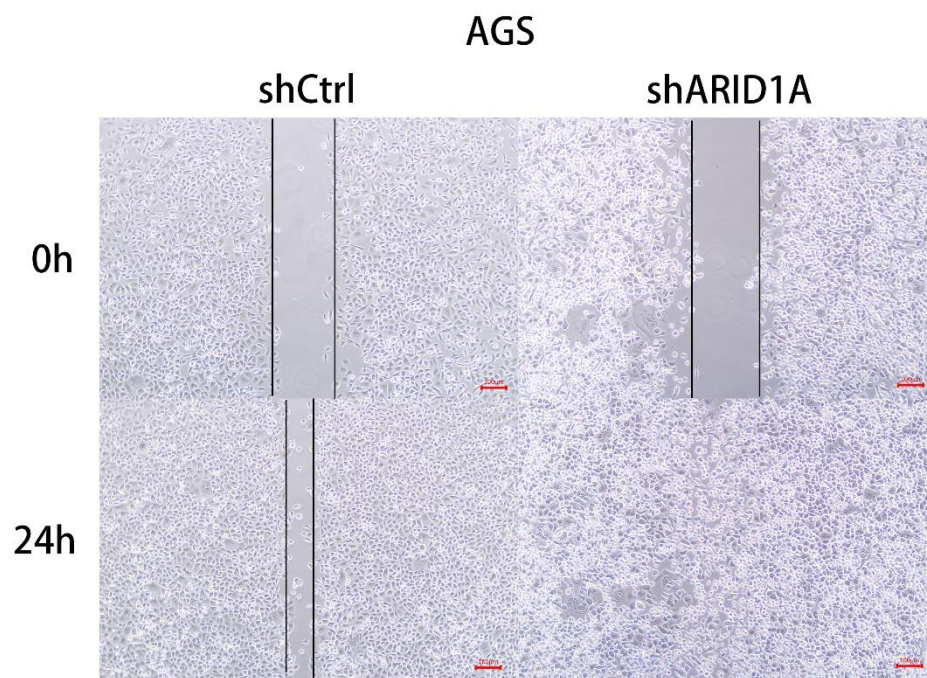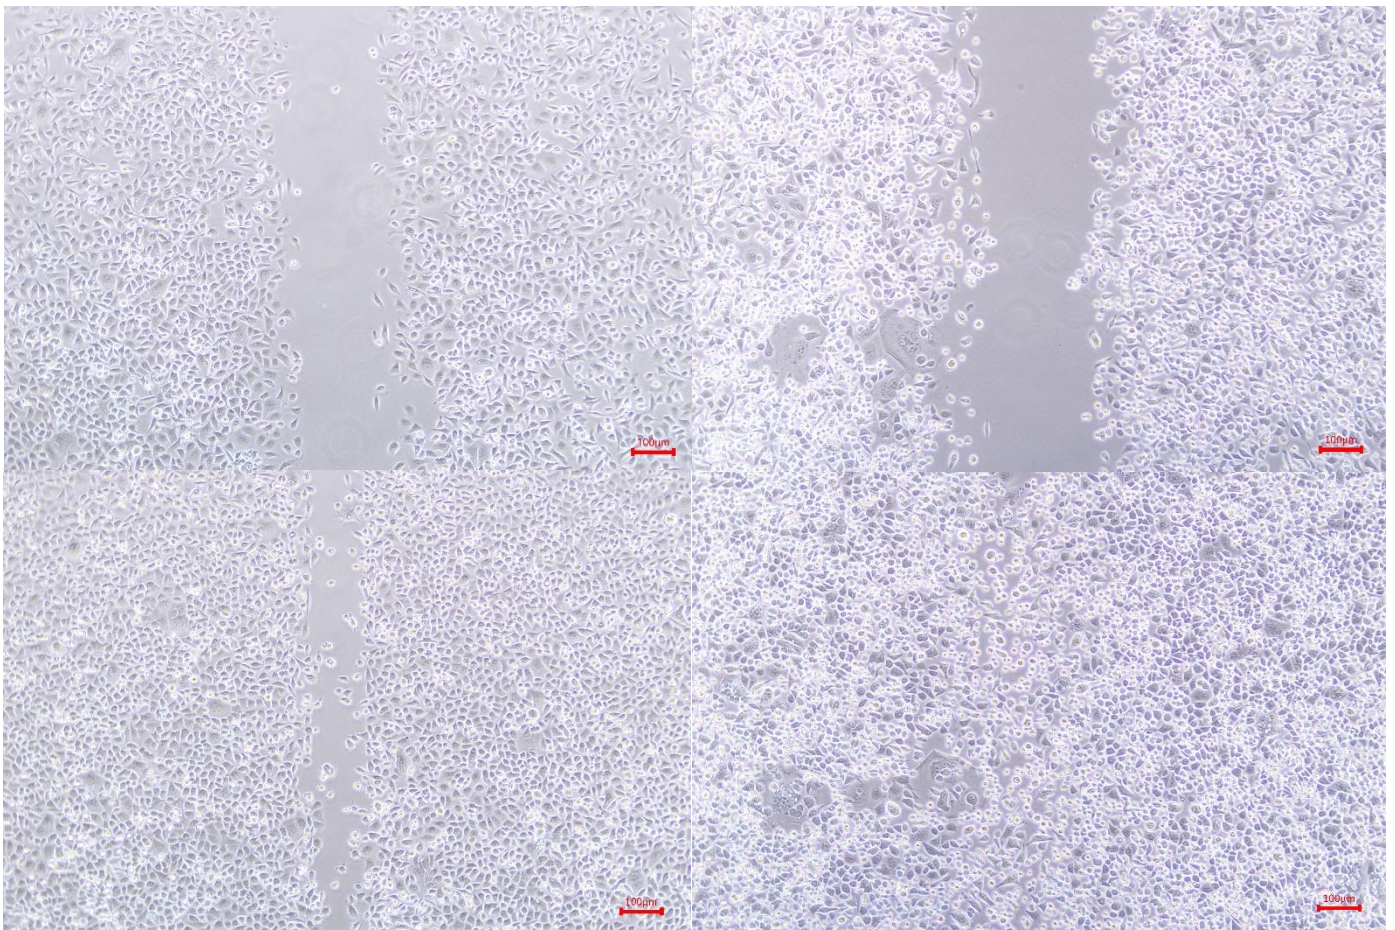



Figure 8H

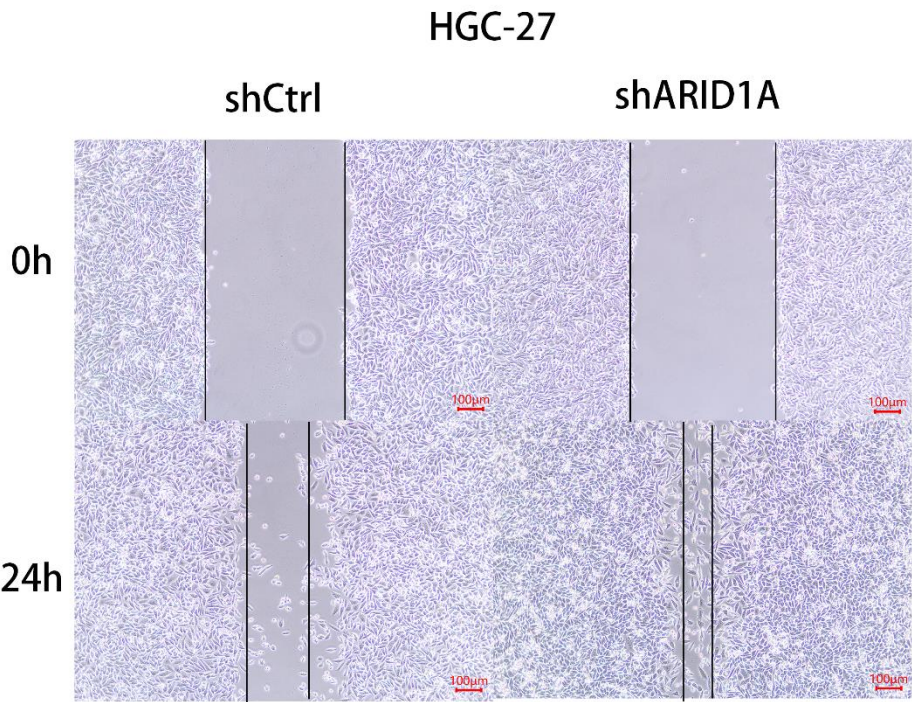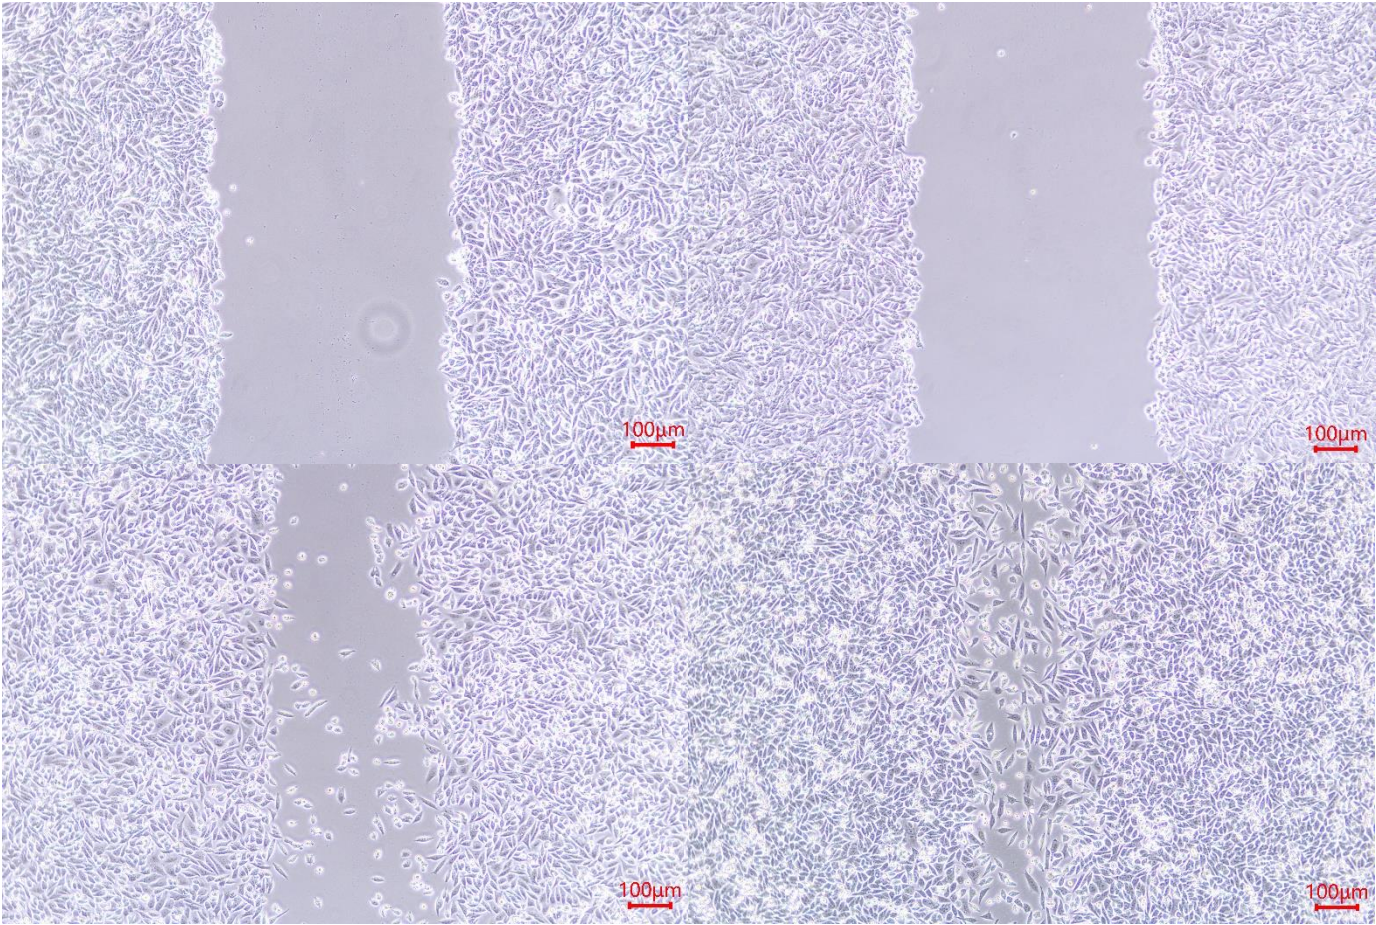



Figure S5I

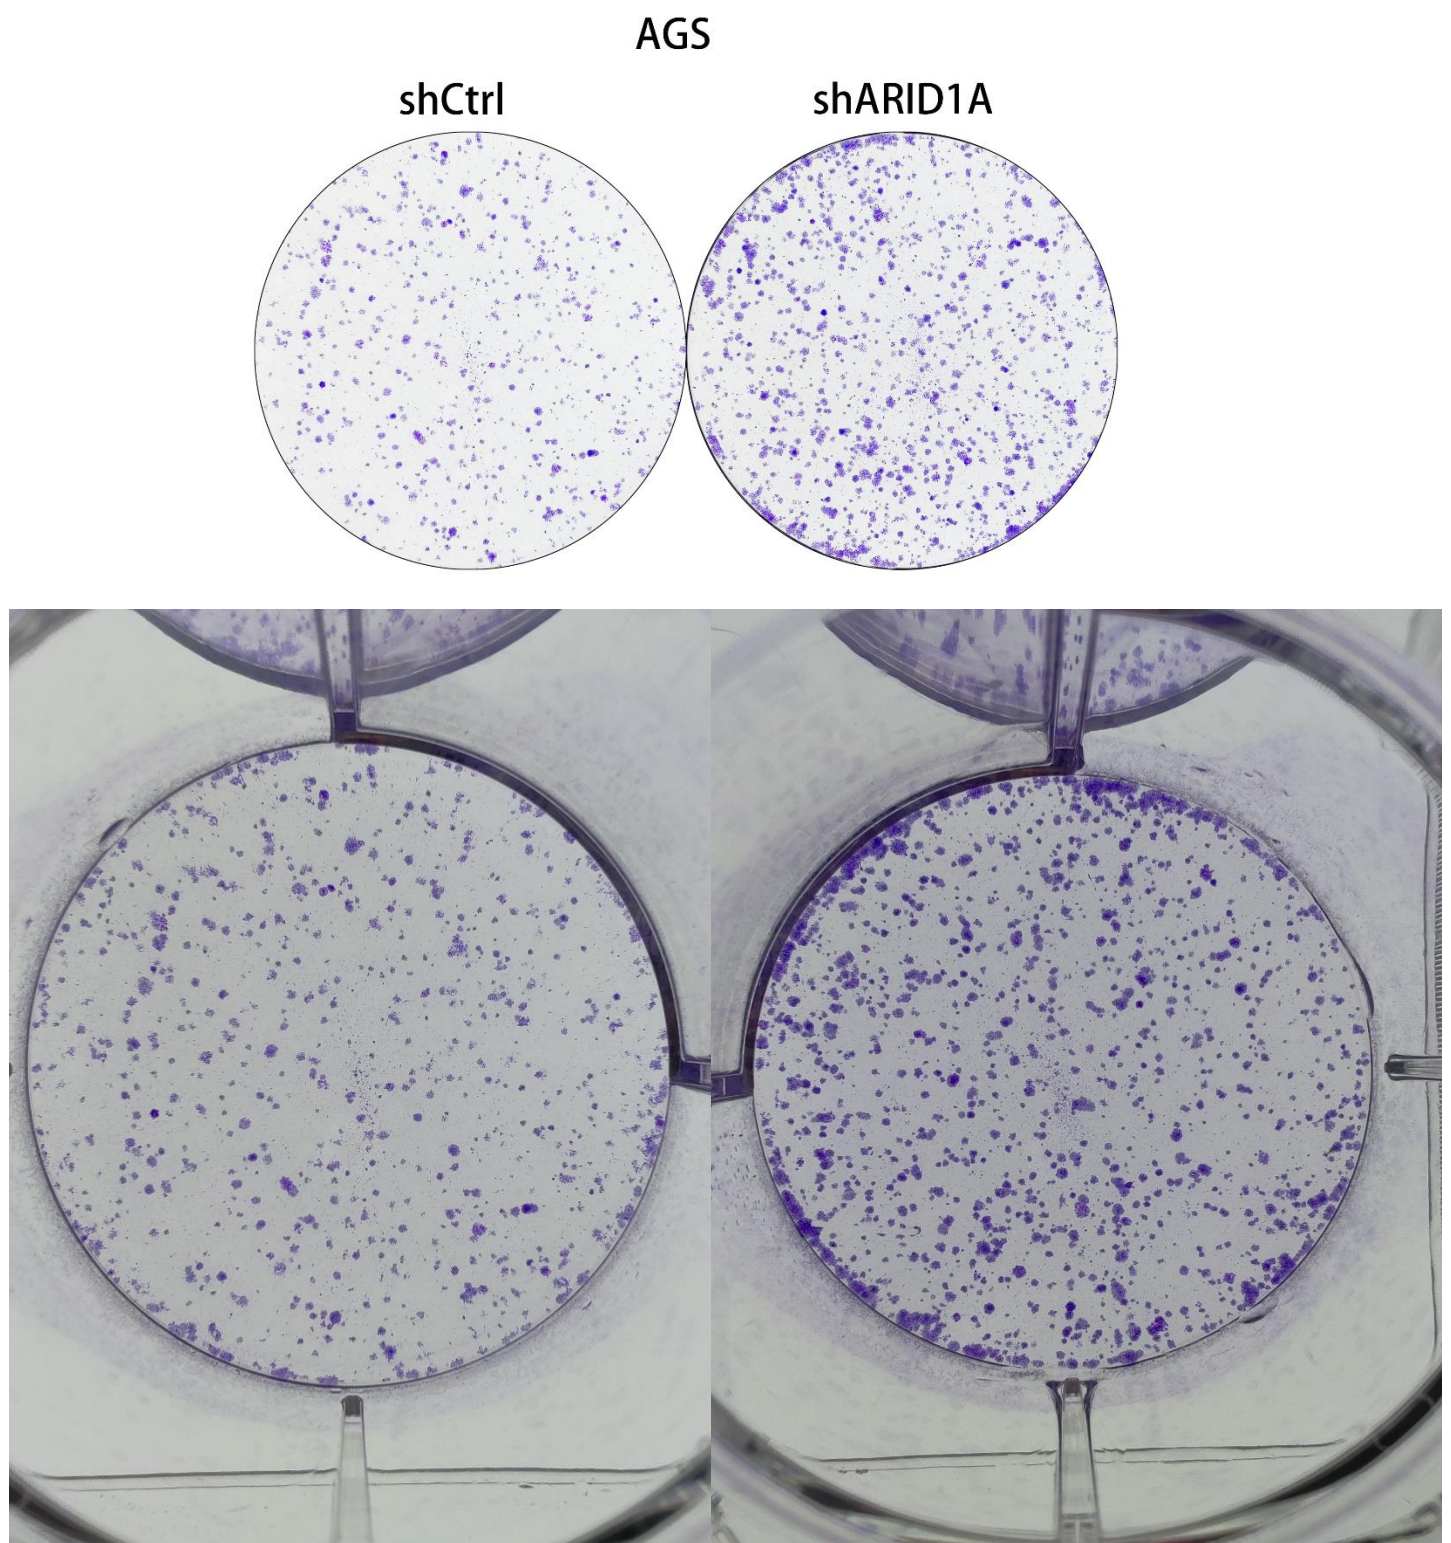

Figure 8I

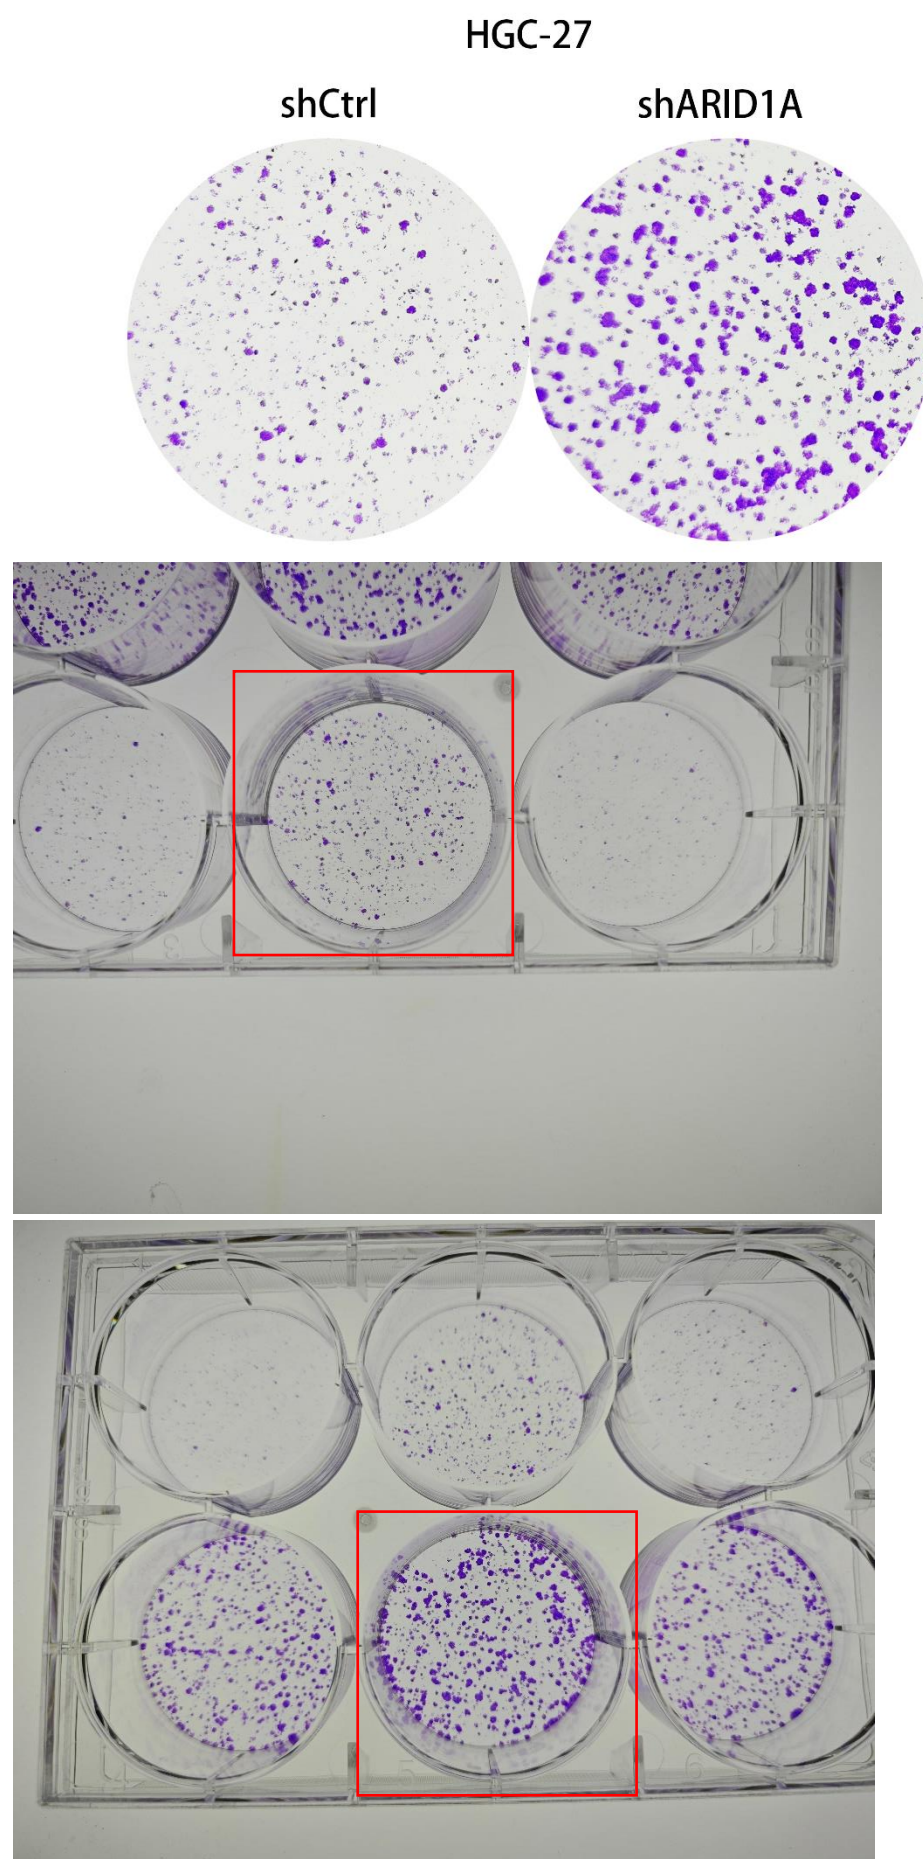



# Figure 9A

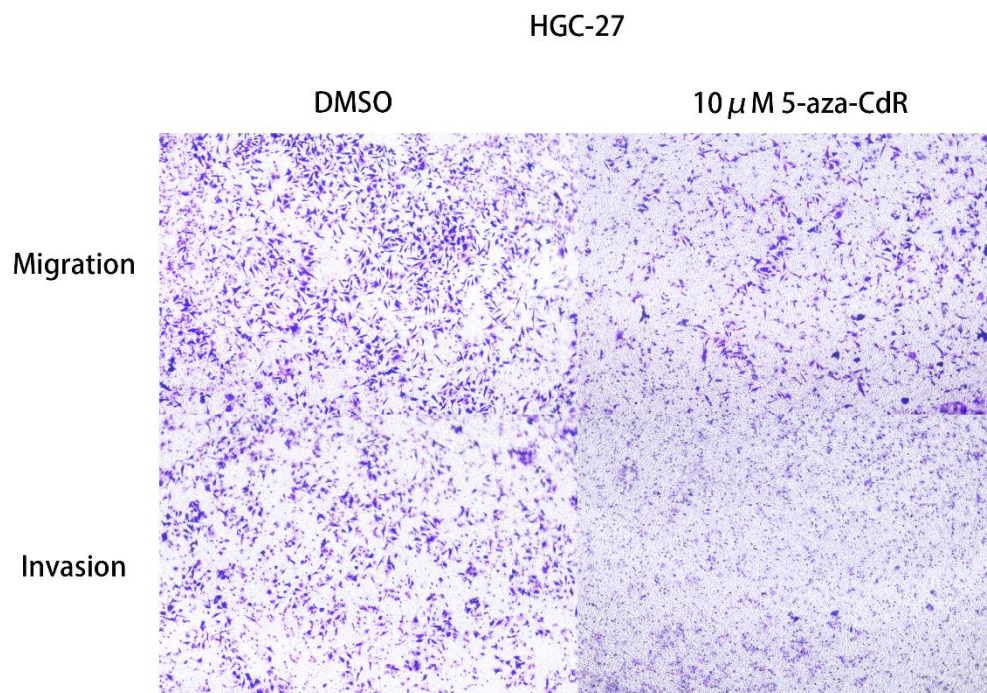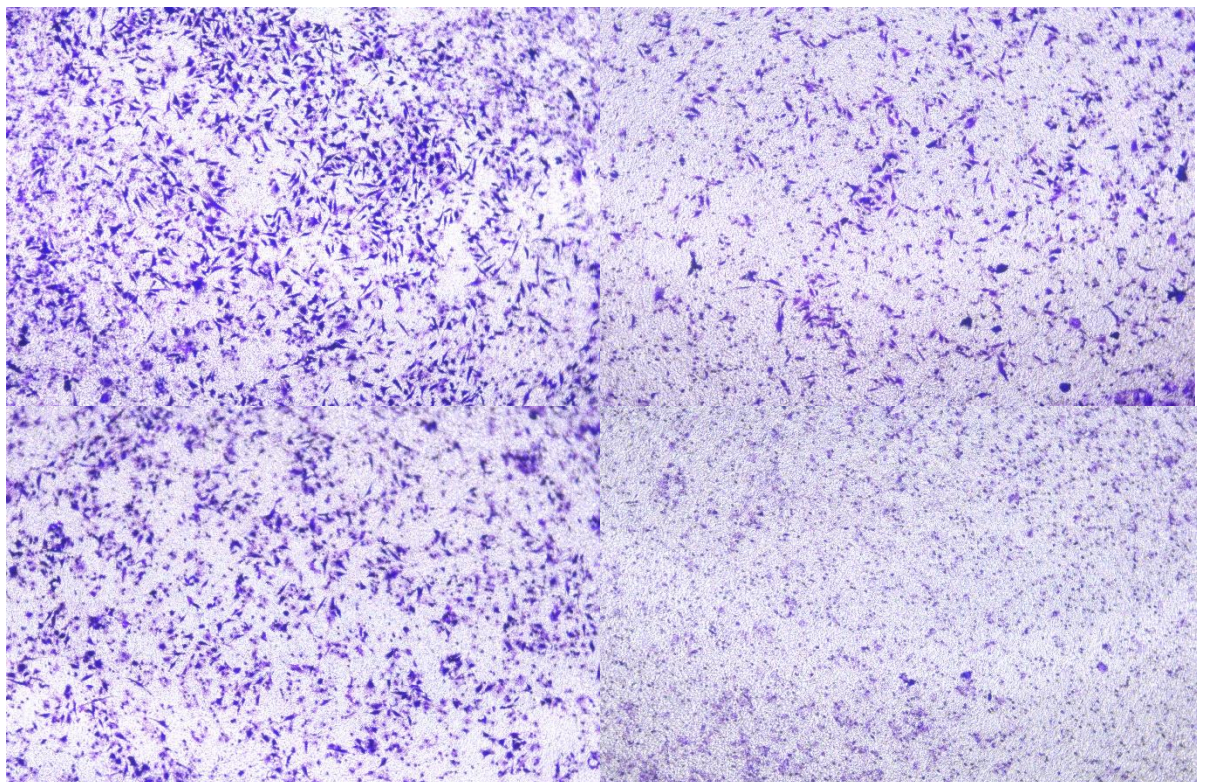



Figure 9D

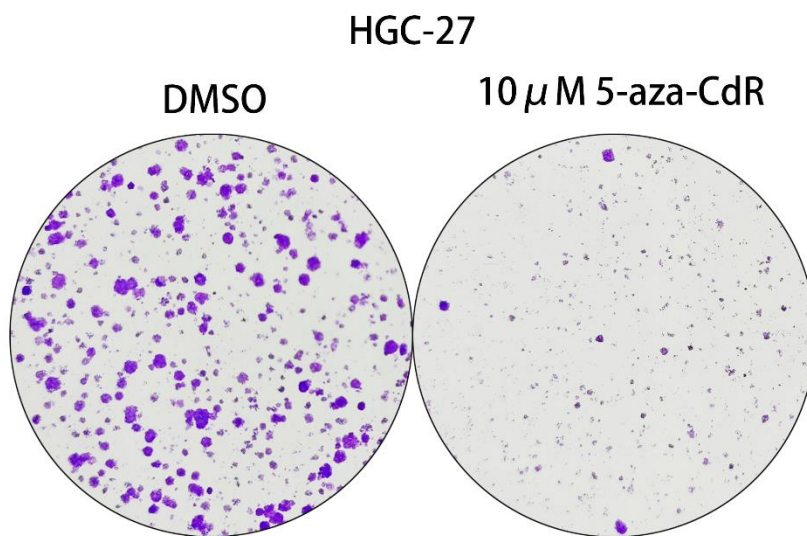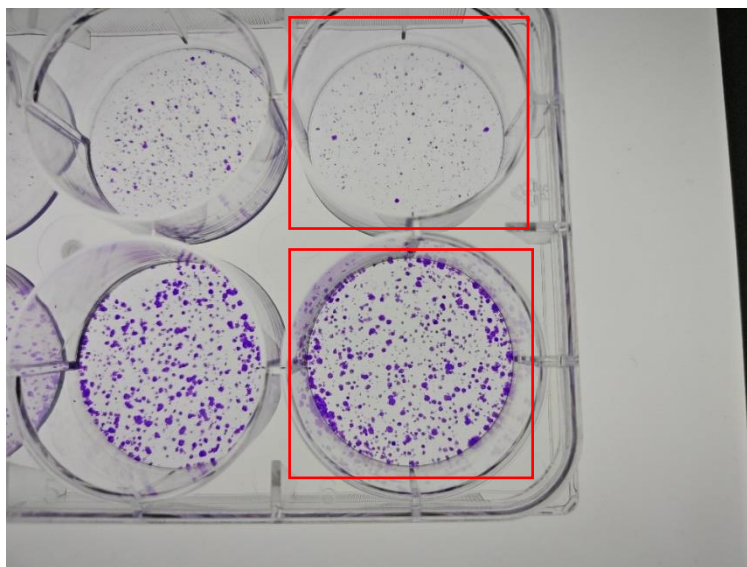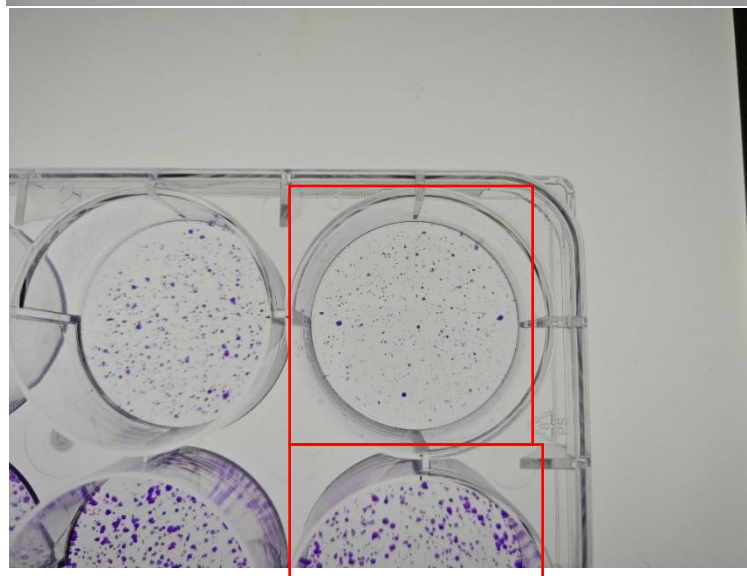

Supplement: raw_data.pdf [file raw_data.pdf]
