# Supplementary material for: Breaking epigenetic shackles: targeting ARID1A methylation and the PI3K/AKT/mTOR-PD-L1 axis to overcome immune escape in gastric cancer
Source: PeerJ journal article supplement (doi:10.7717/peerj.20251), 2025-11-06
Supplement: MIQE_checklist.pdf [file MIQE_checklist.pdf]

1 **Supplemental Table 1.** MIQE 2.0 checklist for authors, reviewers and editors

|                                                                                        | PROVIDED <sup>a</sup> | DESCRIPTION/JUSTIFICATION <sup>b</sup>                                                                                                                                                                         |
|----------------------------------------------------------------------------------------|-----------------------|----------------------------------------------------------------------------------------------------------------------------------------------------------------------------------------------------------------|
| <b>1. REAGENT PREPARATION</b>                                                          |                       |                                                                                                                                                                                                                |
| Bioinformatics tools and versions and settings used to design assays                   | Y                     | Primer-BLAST (NCBI v4.0) was used to design assays with parameters: T <sub>m</sub> 58–62°C, exon-spanning amplicons (80–200 bp), and specificity validated against RefSeq mRNA (2023).                         |
| Official gene symbol, species and sequence accession number                            | Y                     | ARID1A (Homo sapiens), NM_006015.6 (mRNA)                                                                                                                                                                      |
| Location of amplicon                                                                   | Y                     | The ARID1A amplicon spans the exon 3–4 junction (intron-spanning design, 130 bp in length) in transcript NM_006015.6, avoiding genomic DNA amplification.                                                      |
| Amplicon length                                                                        |                       | 130 bp                                                                                                                                                                                                         |
| Primer and probe sequences <sup>c</sup>                                                | Y                     | p.9, line 179-182                                                                                                                                                                                              |
| Location and identity of any modifications                                             | N                     | Not applicable                                                                                                                                                                                                 |
| Manufacturer of oligonucleotides                                                       | Y                     | Sangon Biotech (Shanghai) Co., Ltd., China                                                                                                                                                                     |
| Details of optimization performed                                                      | N                     | Not applicable                                                                                                                                                                                                 |
| <b>2. SAMPLE PREPARATION</b>                                                           |                       |                                                                                                                                                                                                                |
| Detailed description of sample types and numbers                                       | Y                     | p.8, line 160-169                                                                                                                                                                                              |
| Sampling procedure (including time to storage)                                         | Y                     | p.9, line 171-172                                                                                                                                                                                              |
| Sample aliquoting, storage conditions and duration                                     | Y                     | stored at -80°C (≤ 1 months)                                                                                                                                                                                   |
| Description of extraction method including amount of sample processed                  | Y                     | p.9, line 171-175                                                                                                                                                                                              |
| Source and amount of spike-in nucleic acids added                                      | N                     | No spike-in nucleic acids were added (the experiment relies on the endogenous control gene β-actin for normalization).                                                                                         |
| Volume of elution buffer used to elute/resuspend nucleic acids                         | Y                     | 30–50 µL of RNase-free ddH <sub>2</sub> O                                                                                                                                                                      |
| Number of extraction replicates                                                        | Y                     | n>3                                                                                                                                                                                                            |
| Extraction blanks and percent yield included                                           | Y                     | Yield was not explicitly calculated, but RNA concentration (Qubit: 120 ng/µL) and purity (OD <sub>260/280</sub> = 2.0) met the requirements for qPCR.                                                          |
| Method to evaluate quality and quantity of nucleic acids                               | Y                     | NanoDrop 2000 (A <sub>260</sub> /A <sub>280</sub> :1.8-2.1)                                                                                                                                                    |
| Storage conditions: temperature, concentration, duration, buffer, aliquots             | Y                     | Stored at -80°C in RNase-free ddH <sub>2</sub> O (50 ng/µL), aliquoted into 50 µL/tube, stable for ≤ 12 months.                                                                                                |
| Clear description of dilution steps used to prepare working template solution          | Y                     | p.9, line 171-172                                                                                                                                                                                              |
| Template modification (digestion, sonication, pre-amplification, DNase treatment etc.) | N                     | No template modifications (DNase, sonication, digestion, or pre-amplification) were performed; genomic DNA was removed by the reagent's precipitation step, validated by No-RT controls (C <sub>q</sub> ≥ 40). |

|                                                                                                                |   |                                                                                                                                                                                                                                                                                                                                              |
|----------------------------------------------------------------------------------------------------------------|---|----------------------------------------------------------------------------------------------------------------------------------------------------------------------------------------------------------------------------------------------------------------------------------------------------------------------------------------------|
| Purification after modification                                                                                | N | No additional purification was required after RNA extraction, as genomic DNA and contaminants were removed during the RNA-easy Isolation Reagent protocol via chemical precipitation (isopropanol/ethanol washes). RNA was eluted in RNase-free water, and purity was validated by OD260/280 (1.8–2.0) and No-RT controls ( $C_q \geq 40$ ). |
| <b>3. REVERSE TRANSCRIPTION<sup>d</sup></b>                                                                    |   |                                                                                                                                                                                                                                                                                                                                              |
| cDNA priming method and primer concentration                                                                   | Y | Oligo(dT) 100 $\mu$ M                                                                                                                                                                                                                                                                                                                        |
| One or two-step protocol (include reaction details for two-step)                                               | Y | p.9, line 173-175 (Two-step RT-qPCR)                                                                                                                                                                                                                                                                                                         |
| Amount of RNA used per reaction                                                                                | Y | p.9, line 174                                                                                                                                                                                                                                                                                                                                |
| Detailed reaction components and conditions                                                                    | Y | p.9, line 173-175                                                                                                                                                                                                                                                                                                                            |
| Estimated copies measured with and without addition of RT <sup>e</sup>                                         | Y | Estimated copies with RT (+RTe) were $1.2 \times 10^4$ copies/ $\mu$ L for ARID1A and $2.5 \times 10^5$ copies/ $\mu$ L for $\beta$ -actin (standard curve method), while no amplification was detected without RT (-RTe) ( $C_t \geq 40$ cycles; detection limit: 10 copies/ $\mu$ L).                                                      |
| Manufacturer of reagents, catalog number and lot number                                                        | Y | p.9, line 173-175(18090050, 3238857)                                                                                                                                                                                                                                                                                                         |
| Storage of cDNA: temperature, concentration/dilution, duration, buffer, aliquots                               | Y | Stored at -80°C in RNase-free ddH <sub>2</sub> O (10 ng/ $\mu$ L), aliquoted into 20 $\mu$ L/tube, stable for $\leq 12$ months.                                                                                                                                                                                                              |
| <b>4. qPCR PROTOCOL</b>                                                                                        |   |                                                                                                                                                                                                                                                                                                                                              |
| Template treatment (initial heating or chemical denaturation)                                                  | Y | p.9, line 182-184                                                                                                                                                                                                                                                                                                                            |
| Primer and probe concentration in the reaction and source                                                      | Y | 10 $\mu$ M(Sangon Biotech (Shanghai) Co., Ltd., China)                                                                                                                                                                                                                                                                                       |
| Polymerase identity and concentration, Mg <sup>2+</sup> and dNTP concentrations <sup>f</sup>                   | Y | Polymerase (Vazyme Q711-02).<br>Mg <sup>2+</sup> : 3 mM (as per manufacturer's formulation).<br>dNTPs: 0.2 mM each dNTP (pre-mixed in master mix).                                                                                                                                                                                           |
| Buffer/kit (manufacturer, catalog number and lot number)                                                       | Y | p.9, line 176-178(Vazyme ,Cat:Q711-02,Lot:7E2830G4)                                                                                                                                                                                                                                                                                          |
| Complete thermocycling parameters including reaction volume                                                    | Y | p.9, line 182-184                                                                                                                                                                                                                                                                                                                            |
| Manufacturer and type of qPCR instrument                                                                       | Y | p.9, line 176-178                                                                                                                                                                                                                                                                                                                            |
| <b>5. DATA ANALYSIS</b>                                                                                        |   |                                                                                                                                                                                                                                                                                                                                              |
| Storage and submission of raw fluorescence data using RDES <sup>g</sup> or RDML <sup>h</sup>                   | Y | Supplemental Files:QPCR.xlsx                                                                                                                                                                                                                                                                                                                 |
| Identity of standards (synthetic, plasmid, genomic, IVT <sup>i</sup> , mRNA etc.) and method of quantification | Y | 2 <sup>^</sup> (- $\Delta\Delta C_t$ ) method                                                                                                                                                                                                                                                                                                |
| Method of baseline correction and C <sub>q</sub> determination                                                 | Y | Automatically performed by Bio-Rad CFX Maestro software ; C <sub>q</sub> values were derived from the intersection of the fluorescence curve with the threshold line.                                                                                                                                                                        |
| qPCR analysis program (source, version)                                                                        | Y | QuantStudio™ Design & Analysis Software(Thermo Fisher Scientific (USA),v1.5.1)                                                                                                                                                                                                                                                               |

|                                                                            |   |                                                                                                                                                            |
|----------------------------------------------------------------------------|---|------------------------------------------------------------------------------------------------------------------------------------------------------------|
| Details of positive and negative controls                                  | Y | Positive Controls $\beta$ -actin (ACTB): Ct <25 (all samples).<br>Negative controls (No-Template Control (NTC)) .                                          |
| Frequency and Cq of negative controls                                      | Y | NTC showed undetectable amplification (Cq $\geq$ 40).                                                                                                      |
| Examples of positive and negative results                                  | Y | Supplemental Files:QPCR.xlsx                                                                                                                               |
| PCR efficiency estimation and method for its determination                 | Y | Standard Curve                                                                                                                                             |
| Method of target quantity calculation <sup>j</sup>                         | Y | 2 <sup><math>-(\Delta\Delta Ct)</math></sup> method                                                                                                        |
| Description of replicates                                                  | Y | Supplemental Files:QPCR.xlsx(n>3)                                                                                                                          |
| Repeatability (intra-experiment variation)                                 | Y | Supplemental Files:QPCR.xlsx                                                                                                                               |
| Reproducibility (inter-experiment/user/lab etc. variation)                 | Y | Intra-Experiment CV <5% (n=3 technical replicates)<br>Inter-Experiment $\Delta Ct$ <1.0 (tested across 2 independent runs)<br>Supplemental Files:QPCR.xlsx |
| Limit of detection calculated?                                             | N | Not applicable                                                                                                                                             |
| Dynamic range (limits of quantification)                                   | N | Not applicable                                                                                                                                             |
| Method of validation of reference genes                                    | Y | $\Delta Ct$                                                                                                                                                |
| Description of normalization method / calculation of normalized expression | Y | 2 <sup><math>-(\Delta\Delta Ct)</math></sup>                                                                                                               |
| Statistical methods used for analysis                                      | Y | p.9, line 184-185                                                                                                                                          |
| Choice of significance level and calculation of statistical power          | Y | P<0.05                                                                                                                                                     |
| Specificity (when measuring rare mutations, pathogen sequences etc.)       | N | Not applicable                                                                                                                                             |

<sup>a</sup> Authors should insert “Yes” or “No”.

<sup>b</sup> If “Yes”, specify the location of the information in the article or include the information here. If “No”, outline the rationale for omission.

<sup>c</sup> Disclosure of the primer and probe sequences is highly desirable and strongly encouraged. However, when commercial pre-designed assay vendors do not release this information, assay context sequences must be submitted.

<sup>d</sup> This section and parts of Section 5 may not apply depending on the experiment.

<sup>e</sup> Assessing the absence of DNA using a no RT assay (or where RT has been inactivated) is important when first extracting RNA. Once the sample has been validated as DNA-free, inclusion of a no-RT control is desirable, but no longer essential.

<sup>f</sup> Details of reaction components are highly desirable, however not always provided by commercial vendors. Inclusion of reagent manufacturer, catalog and batch number as well as assay context sequences is necessary where component reagent details are not available.

<sup>g</sup> Real-time PCR Data Essential Spreadsheet Format (1).

<sup>h</sup> Real-Time PCR Data Markup Language (2).

<sup>i</sup> *in vitro* transcribed.

<sup>j</sup> Efficiency-corrected target quantity calculation is necessary.

20   **References**

- 21    1.    Untergasser A, Hellemans J, Pfaffl MW, et al. Disclosing quantitative RT-PCR raw  
22       data during manuscript submission: a call for action. *Molecular Oncology* 2023;  
23       17:713–17.
- 24    2.    Lefever S et al. RDML: structured language and reporting guidelines for real-time  
25       quantitative PCR data. *Nucleic Acids Res* 2009; 37:2065–69.

26
