# Supplementary material for: Breaking epigenetic shackles: targeting ARID1A methylation and the PI3K/AKT/mTOR-PD-L1 axis to overcome immune escape in gastric cancer
Source: PeerJ. 2025 Nov 6;13:e20251. doi: 10.7717/peerj.20251 (PMC12596888; doi:10.7717/peerj.20251)
Supplement: Supplemental Information 3 [file peerj-13-20251-s003.xlsx]

## Sheet: Sheet1
Sample Id	ARID1A: mRNA expression (RNA Seq V2 RSEM) (log2(value + 1))	ARID1A: Methylation (HM450) (log2(value + 1))
TCGA-3M-AB46-01	3474.49	0.045449
TCGA-3M-AB47-01	3424.9	0.036287
TCGA-B7-5816-01	1967.26	0.063907
TCGA-B7-5818-01	6857.24	0.048743
TCGA-B7-A5TI-01	2524.37	0.028451
TCGA-B7-A5TJ-01	3196.26	0.03475
TCGA-B7-A5TK-01	1828.92	0.035797
TCGA-B7-A5TN-01	1935.88	0.048415
TCGA-BR-6452-01	3803.78	0.036854
TCGA-BR-6453-01	3606.07	0.042528
TCGA-BR-6454-01	3333.52	0.037067
TCGA-BR-6455-01	5289.92	0.036003
TCGA-BR-6456-01	2702.6	0.048572
TCGA-BR-6457-01	4425.72	0.036419
TCGA-BR-6458-01	4114.39	0.039445
TCGA-BR-6563-01	2416.52	0.035285
TCGA-BR-6564-01	3644.06	0.051356
TCGA-BR-6565-01	2576.48	0.048152
TCGA-BR-6566-01	1394.37	0.045583
TCGA-BR-6705-01	5518.41	0.035907
TCGA-BR-6706-01	3719.06	0.042418
TCGA-BR-6707-01	3105.91	0.041128
TCGA-BR-6709-01	2824.95	0.049398
TCGA-BR-6801-01	2684.52	0.046704
TCGA-BR-6802-01	3201.86	0.034063
TCGA-BR-6803-01	4492.93	0.037924
TCGA-BR-6852-01	5555.76	0.037741
TCGA-BR-7196-01	2259.94	0.036539
TCGA-BR-7197-01	4670.01	0.035688
TCGA-BR-7703-01	2554.45	0.037046
TCGA-BR-7704-01	2016.13	0.042808
TCGA-BR-7707-01	2291.17	0.045031
TCGA-BR-7715-01	2789.73	0.045685
TCGA-BR-7716-01	4039.87	0.038644
TCGA-BR-7717-01	1898.58	0.038526
TCGA-BR-7722-01	4105.11	0.048556
TCGA-BR-7723-01	8755.12	0.035038
TCGA-BR-7851-01	3987.23	0.044135
TCGA-BR-7901-01	3327.03	0.045202
TCGA-BR-7957-01	4722.84	0.039339
TCGA-BR-7958-01	3727.15	0.046266
TCGA-BR-7959-01	3183.16	0.050645
TCGA-BR-8058-01	3769.5	0.041507
TCGA-BR-8059-01	2593.91	0.047804
TCGA-BR-8060-01	4755.97	0.043172
TCGA-BR-8077-01	4481.55	0.047216
TCGA-BR-8078-01	4466.62	0.041395
TCGA-BR-8080-01	3926.18	0.052664
TCGA-BR-8081-01	4167.05	0.035446
TCGA-BR-8284-01	5647.61	0.042765
TCGA-BR-8286-01	4179.61	0.036305
TCGA-BR-8289-01	4073.26	0.050382
TCGA-BR-8291-01	2847.59	0.042094
TCGA-BR-8295-01	6249.55	0.039166
TCGA-BR-8296-01	5160.96	0.056957
TCGA-BR-8297-01	4014.79	0.041055
TCGA-BR-8361-01	2695.93	0.047196
TCGA-BR-8362-01	5154.16	0.050161
TCGA-BR-8363-01	4030.37	0.042153
TCGA-BR-8364-01	3814.05	0.044118
TCGA-BR-8365-01	3829.37	0.041457
TCGA-BR-8366-01	4558.33	0.048974
TCGA-BR-8367-01	4909.6	0.044188
TCGA-BR-8368-01	4124.23	0.037172
TCGA-BR-8369-01	5057.3	0.03821
TCGA-BR-8371-01	3972.62	0.042649
TCGA-BR-8372-01	2010.75	0.042789
TCGA-BR-8373-01	7201.19	0.040811
TCGA-BR-8380-01	4603.14	0.03925
TCGA-BR-8381-01	4977.82	0.032998
TCGA-BR-8382-01	2625.19	0.040735
TCGA-BR-8384-01	4147.94	0.038672
TCGA-BR-8483-01	2551.19	0.049088
TCGA-BR-8484-01	4675.86	0.049169
TCGA-BR-8485-01	4910.25	0.043563
TCGA-BR-8486-01	4575.72	0.045488
TCGA-BR-8487-01	2849.94	0.042065
TCGA-BR-8588-01	3856.47	0.044372
TCGA-BR-8589-01	3682.47	0.04147
TCGA-BR-8590-01	3738.24	0.053706
TCGA-BR-8591-01	4422.86	0.049144
TCGA-BR-8592-01	4928.39	0.042815
TCGA-BR-8676-01	5721.44	0.042333
TCGA-BR-8677-01	2561.56	0.046301
TCGA-BR-8678-01	5353.93	0.037594
TCGA-BR-8679-01	3617.54	0.039645
TCGA-BR-8680-01	4808.6	0.039338
TCGA-BR-8682-01	4583.18	0.040691
TCGA-BR-8683-01	4660.52	0.044628
TCGA-BR-8686-01	4400.53	0.037441
TCGA-BR-8687-01	5905.46	0.042302
TCGA-BR-8690-01	6214.95	0.053989
TCGA-BR-A44T-01	5029.14	0.037881
TCGA-BR-A44U-01	2836.36	0.035319
TCGA-BR-A452-01	2705.91	0.05625
TCGA-BR-A453-01	3525.86	0.035236
TCGA-BR-A4CR-01	7910.49	0.03341
TCGA-BR-A4CS-01	2673.93	0.046046
TCGA-BR-A4IU-01	4321.35	0.096716
TCGA-BR-A4IV-01	4257.77	0.069723
TCGA-BR-A4IY-01	4185.99	0.076173
TCGA-BR-A4IZ-01	3626.68	0.047153
TCGA-BR-A4J1-01	3509.24	0.07195
TCGA-BR-A4J2-01	4386.22	0.056584
TCGA-BR-A4J4-01	3485.86	0.046559
TCGA-BR-A4J5-01	3408.94	0.051927
TCGA-BR-A4J6-01	2659.63	0.061485
TCGA-BR-A4J7-01	3365.79	0.081718
TCGA-BR-A4J8-01	3014.72	0.075746
TCGA-BR-A4J9-01	4114.71	0.049714
TCGA-BR-A4PD-01	3434.73	0.038183
TCGA-BR-A4PE-01	2664.01	0.05592
TCGA-BR-A4PF-01	4233.9	0.067511
TCGA-BR-A4QI-01	2396.62	0.070341
TCGA-BR-A4QL-01	1363.41	0.070079
TCGA-BR-A4QM-01	3140.36	0.046136
TCGA-CD-5798-01	2397.85	0.083082
TCGA-CD-5799-01	2514.14	0.083467
TCGA-CD-5800-01	3923.21	0.069441
TCGA-CD-5801-01	2671.82	0.244734
TCGA-CD-5803-01	2740.99	0.073561
TCGA-CD-5804-01	2329.74	0.043872
TCGA-CD-5813-01	4466.76	0.058934
TCGA-CD-8524-01	4807.2	0.041041
TCGA-CD-8525-01	3714.86	0.039998
TCGA-CD-8526-01	6537.19	0.037938
TCGA-CD-8527-01	3045.31	0.038016
TCGA-CD-8528-01	3395.21	0.043808
TCGA-CD-8529-01	3635.97	0.045609
TCGA-CD-8530-01	5148.86	0.049484
TCGA-CD-8531-01	6478.84	0.048037
TCGA-CD-8532-01	1250.59	0.070354
TCGA-CD-8533-01	5894.08	0.043903
TCGA-CD-8534-01	4041.04	0.047563
TCGA-CD-8535-01	3719.25	0.053502
TCGA-CD-8536-01	882.131	0.053796
TCGA-CD-A486-01	4149.04	0.036794
TCGA-CD-A487-01	3571	0.040933
TCGA-CD-A489-01	2804.39	0.036606
TCGA-CD-A48A-01	6633.05	0.043305
TCGA-CD-A48C-01	2045.78	0.050604
TCGA-CD-A4MG-01	2767.95	0.10484
TCGA-CD-A4MH-01	3968.68	0.096458
TCGA-CD-A4MI-01	3051.06	0.103152
TCGA-CD-A4MJ-01	3883.9	0.047016
TCGA-CG-4437-01	2855.09	0.043602
TCGA-CG-4441-01	651.961	0.095178
TCGA-CG-5716-01	4112.21	0.038292
TCGA-CG-5717-01	3772.22	0.06335
TCGA-CG-5718-01	5649.35	0.04308
TCGA-CG-5719-01	2336.78	0.069067
TCGA-CG-5720-01	3174.42	0.062906
TCGA-CG-5721-01	3482.7	0.096525
TCGA-CG-5722-01	3485.4	0.095091
TCGA-CG-5723-01	3260.18	0.066792
TCGA-CG-5724-01	1958.55	0.05696
TCGA-CG-5725-01	3097.51	0.060997
TCGA-CG-5726-01	3048.17	0.08138
TCGA-CG-5732-01	3682.3	0.060963
TCGA-CG-5734-01	3396.54	0.070044
TCGA-D7-5577-01	2997.15	0.062441
TCGA-D7-5578-01	4618.96	0.072671
TCGA-D7-6518-01	3429.79	0.044008
TCGA-D7-6519-01	2505.06	0.051985
TCGA-D7-6520-01	5348.36	0.041024
TCGA-D7-6521-01	2232.69	0.037239
TCGA-D7-6522-01	4326.06	0.045996
TCGA-D7-6524-01	3669.98	0.041347
TCGA-D7-6525-01	3408.33	0.036222
TCGA-D7-6526-01	3411.79	0.044779
TCGA-D7-6527-01	2725.22	0.038668
TCGA-D7-6528-01	3449.2	0.05635
TCGA-D7-6815-01	3579.59	0.034288
TCGA-D7-6817-01	5920.63	0.042822
TCGA-D7-6818-01	5306.17	0.033679
TCGA-D7-6820-01	6289.15	0.039162
TCGA-D7-6822-01	3889.32	0.058535
TCGA-D7-8570-01	3771.59	0.073867
TCGA-D7-8572-01	5597.98	0.036102
TCGA-D7-8573-01	4637.43	0.047989
TCGA-D7-8574-01	6400.57	0.030425
TCGA-D7-8575-01	4093.36	0.05716
TCGA-D7-8576-01	3856.56	0.044889
TCGA-D7-8578-01	4036.74	0.044889
TCGA-D7-8579-01	3725.47	0.043623
TCGA-D7-A4YT-01	3401.01	0.116752
TCGA-D7-A4YU-01	5255.58	0.065834
TCGA-D7-A4YV-01	6948.84	0.041449
TCGA-D7-A4YX-01	2545.59	0.080442
TCGA-D7-A4YY-01	2205.7	0.097413
TCGA-D7-A4Z0-01	4054.67	0.053443
TCGA-D7-A6EV-01	3708.38	0.049215
TCGA-D7-A6EX-01	2268.87	0.036339
TCGA-D7-A6EY-01	4641.38	0.0322
TCGA-D7-A6EZ-01	2047.5	0.03267
TCGA-D7-A6F0-01	5185.52	0.029269
TCGA-D7-A6F2-01	5050.12	0.028484
TCGA-D7-A747-01	4203.34	0.046373
TCGA-D7-A748-01	2685.01	0.039799
TCGA-D7-A74A-01	1480.75	0.0731
TCGA-EQ-8122-01	3247.77	0.044873
TCGA-EQ-A4SO-01	2099.46	0.106945
TCGA-F1-6177-01	6730.48	0.037892
TCGA-F1-6874-01	4434.72	0.040136
TCGA-F1-6875-01	2903.23	0.04553
TCGA-F1-A448-01	3079.47	0.039382
TCGA-F1-A72C-01	1911.63	0.043926
TCGA-FP-7735-01	2261.37	0.04166
TCGA-FP-7829-01	3808.97	0.039932
TCGA-FP-7916-01	4028.86	0.047424
TCGA-FP-7998-01	4223.01	0.036073
TCGA-FP-8099-01	2121.92	0.039799
TCGA-FP-8209-01	5933.07	0.04253
TCGA-FP-8210-01	4888.36	0.046342
TCGA-FP-8211-01	2729.96	0.048987
TCGA-FP-8631-01	3549.92	0.052959
TCGA-FP-A4BE-01	2194.21	0.031539
TCGA-FP-A4BF-01	2769.86	0.033507
TCGA-FP-A8CX-01	4104.5	0.0377
TCGA-FP-A9TM-01	5290.05	0.042358
TCGA-HF-7131-01	3062.96	0.043789
TCGA-HF-7132-01	3676.97	0.037473
TCGA-HF-7133-01	2793.41	0.045484
TCGA-HF-7134-01	3029.83	0.048931
TCGA-HF-7136-01	4965.34	0.038465
TCGA-HF-A5NB-01	2959.26	0.031143
TCGA-HJ-7597-01	5480.4	0.039093
TCGA-HU-8238-01	2989.13	0.065787
TCGA-HU-8243-01	679.516	0.072492
TCGA-HU-8244-01	5702.95	0.04179
TCGA-HU-8249-01	4014.79	0.04059
TCGA-HU-8602-01	2046.59	0.039594
TCGA-HU-8604-01	3640.13	0.04606
TCGA-HU-8608-01	3753.88	0.038705
TCGA-HU-8610-01	2925.97	0.047399
TCGA-HU-A4G2-01	3425.69	0.111983
TCGA-HU-A4G3-01	4741.76	0.040933
TCGA-HU-A4G6-01	2876.67	0.042733
TCGA-HU-A4G8-01	3835.14	0.046442
TCGA-HU-A4G9-01	2923.54	0.037945
TCGA-HU-A4GC-01	3526.87	0.104645
TCGA-HU-A4GD-01	4569.63	0.081258
TCGA-HU-A4GF-01	2305.86	0.058507
TCGA-HU-A4GH-01	7155.96	0.036884
TCGA-HU-A4GJ-01	6717.54	0.13025
TCGA-HU-A4GN-01	1364.46	0.058809
TCGA-HU-A4GP-01	3524.03	0.063845
TCGA-HU-A4GQ-01	3844.08	0.069899
TCGA-HU-A4GT-01	2919.5	0.073124
TCGA-HU-A4GU-01	3841.24	0.083587
TCGA-HU-A4GX-01	2873.91	0.10173
TCGA-HU-A4GY-01	5212.29	0.03512
TCGA-HU-A4H0-01	4554.42	0.092831
TCGA-HU-A4H2-01	3391.33	0.059194
TCGA-HU-A4H3-01	3486.66	0.075869
TCGA-HU-A4H4-01	1769.91	0.05367
TCGA-HU-A4H5-01	2726.2	0.098092
TCGA-HU-A4H6-01	4259.19	0.060259
TCGA-HU-A4H8-01	5009.53	0.06583
TCGA-HU-A4HB-01	4510.22	0.077009
TCGA-HU-A4HD-01	4361.95	0.048681
TCGA-IN-7806-01	3760.8	0.037341
TCGA-IN-7808-01	5768.85	0.050835
TCGA-IN-8462-01	3823.16	0.041746
TCGA-IN-8663-01	4632.42	0.040197
TCGA-IN-A6RI-01	5177.61	0.044392
TCGA-IN-A6RJ-01	4328.94	0.060782
TCGA-IN-A6RL-01	3752.64	0.047665
TCGA-IN-A6RN-01	2455.18	0.053931
TCGA-IN-A6RO-01	4270.04	0.035085
TCGA-IN-A6RR-01	3013.98	0.047081
TCGA-IN-A6RS-01	2428.93	0.047166
TCGA-IN-A7NR-01	4130.88	0.038973
TCGA-IN-A7NT-01	3535.92	0.036182
TCGA-IN-A7NU-01	2762.9	0.031427
TCGA-IN-AB1V-01	5721.55	0.039374
TCGA-IN-AB1X-01	4231.43	0.033334
TCGA-IP-7968-01	5242.52	0.046209
TCGA-KB-A6F7-01	1479.36	0.056276
TCGA-KB-A93G-01	5373.52	0.040779
TCGA-KB-A93H-01	2386.76	0.034753
TCGA-KB-A93J-01	4064.42	0.038909
TCGA-MX-A5UG-01	5581.58	0.033503
TCGA-MX-A5UJ-01	3403.31	0.039244
TCGA-MX-A663-01	5245.05	0.042677
TCGA-MX-A666-01	5886.28	0.032885
TCGA-R5-A7O7-01	3918.69	0.045409
TCGA-R5-A7ZE-01	2569.12	0.051521
TCGA-R5-A7ZF-01	2290.37	0.047321
TCGA-R5-A7ZI-01	2038.95	0.038418
TCGA-R5-A7ZR-01	2237.05	0.047868
TCGA-R5-A805-01	3237.92	0.040413
TCGA-RD-A7BS-01	2995.39	0.052294
TCGA-RD-A7BT-01	2261.16	0.048842
TCGA-RD-A7BW-01	3299.28	0.047626
TCGA-RD-A7C1-01	1675.38	0.053328
TCGA-RD-A8MV-01	2912.23	0.037478
TCGA-RD-A8MW-01	4304.21	0.035635
TCGA-RD-A8N0-01	4159.09	0.031755
TCGA-RD-A8N1-01	5041.76	0.036776
TCGA-RD-A8N2-01	4558.86	0.036302
TCGA-RD-A8N4-01	4097.45	0.039533
TCGA-RD-A8N5-01	3065.78	0.045799
TCGA-RD-A8N6-01	5307.54	0.035068
TCGA-RD-A8N9-01	3898.43	0.039628
TCGA-RD-A8NB-01	5517.28	0.03003
TCGA-SW-A7EA-01	1529.48	0.035005
TCGA-SW-A7EB-01	5094.79	0.045019
TCGA-VQ-A8DT-01	3399.33	0.037331
TCGA-VQ-A8DU-01	5366.48	0.036282
TCGA-VQ-A8DV-01	3182.28	0.041442
TCGA-VQ-A8DZ-01	4089.3	0.039358
TCGA-VQ-A8E0-01	3557.59	0.033831
TCGA-VQ-A8E2-01	8554.17	0.034012
TCGA-VQ-A8E3-01	4065.29	0.036593
TCGA-VQ-A8E7-01	3773.45	0.042165
TCGA-VQ-A8P2-01	2087.19	0.039895
TCGA-VQ-A8P3-01	3791.21	0.045397
TCGA-VQ-A8P5-01	3415.53	0.038449
TCGA-VQ-A8P8-01	3270.36	0.029746
TCGA-VQ-A8PB-01	4790.85	0.034805
TCGA-VQ-A8PC-01	5034.91	0.033433
TCGA-VQ-A8PD-01	6305.64	0.036256
TCGA-VQ-A8PE-01	4411.18	0.04255
TCGA-VQ-A8PF-01	6223.11	0.054464
TCGA-VQ-A8PH-01	3749.84	0.037605
TCGA-VQ-A8PJ-01	4303.8	0.049193
TCGA-VQ-A8PK-01	590.932	0.057327
TCGA-VQ-A8PM-01	5155.31	0.055648
TCGA-VQ-A8PO-01	2983.92	0.035424
TCGA-VQ-A8PP-01	4681.3	0.045046
TCGA-VQ-A8PQ-01	6852.61	0.041508
TCGA-VQ-A8PU-01	2508.15	0.047332
TCGA-VQ-A8PX-01	3972.76	0.038808
TCGA-VQ-A91A-01	4191.43	0.037428
TCGA-VQ-A91D-01	2482.19	0.050473
TCGA-VQ-A91E-01	4716.82	0.036821
TCGA-VQ-A91K-01	4178.55	0.041418
TCGA-VQ-A91N-01	4450.2	0.044071
TCGA-VQ-A91Q-01	4538.06	0.036031
TCGA-VQ-A91S-01	4315.45	0.042053
TCGA-VQ-A91U-01	3831.98	0.044446
TCGA-VQ-A91V-01	4213	0.038065
TCGA-VQ-A91W-01	5925.12	0.034966
TCGA-VQ-A91X-01	3648.01	0.033632
TCGA-VQ-A91Y-01	4061.3	0.042662
TCGA-VQ-A91Z-01	3193.33	0.070489
TCGA-VQ-A922-01	7393.5	0.039467
TCGA-VQ-A923-01	4395.09	0.041844
TCGA-VQ-A924-01	3091.8	0.0477
TCGA-VQ-A925-01	2221.92	0.048449
TCGA-VQ-A927-01	5082.95	0.036576
TCGA-VQ-A928-01	6120.38	0.033081
TCGA-VQ-A92D-01	3007.88	0.041648
TCGA-VQ-A94O-01	5433.3	0.047325
TCGA-VQ-A94P-01	4118.66	0.040658
TCGA-VQ-A94R-01	7465.27	0.046598
TCGA-VQ-A94T-01	4170.41	0.040833
TCGA-VQ-A94U-01	5178.54	0.041642
TCGA-VQ-AA64-01	1070.03	0.050092
TCGA-VQ-AA68-01	5548.46	0.041616
TCGA-VQ-AA69-01	7192.23	0.034527
TCGA-VQ-AA6A-01	3908.62	0.041258
TCGA-VQ-AA6B-01	3341.58	0.041585
TCGA-VQ-AA6D-01	3619.28	0.047137
TCGA-VQ-AA6F-01	1953.64	0.042078
TCGA-VQ-AA6G-01	3928.83	0.040256
TCGA-VQ-AA6I-01	6053.03	0.035546
TCGA-VQ-AA6J-01	1976.66	0.051931
TCGA-VQ-AA6K-01	3094.35	0.047885
TCGA-ZA-A8F6-01	3985.44	0.04491
TCGA-ZQ-A9CR-01	2216.15	0.034925
