# Supplementary material for: Breaking epigenetic shackles: targeting ARID1A methylation and the PI3K/AKT/mTOR-PD-L1 axis to overcome immune escape in gastric cancer
Source: PeerJ. 2025 Nov 6;13:e20251. doi: 10.7717/peerj.20251 (PMC12596888; doi:10.7717/peerj.20251)
Supplement: Supplemental Information 4 [file peerj-13-20251-s004.xlsx]

## Sheet: Figure1E-L
promoter-associated probes	cg05307957		cg00371107		cg05649922		cg03123091		cg05300440		cg04360147		cg04081153		cg05445839
Group-ARID1A expression	high	low	high	low	high	low	high	low	high	low	high	low	high	low	high	cg05445839
	0.061275	0.05767	0.055422	0.096733	0.249505	0.344791	0.748679	0.794834	0.907558	0.92748	0.028347	0.033136	0.010961	0.012161	0.029366	0.038464
	0.104219	0.077453	0.050401	0.086486	0.345309	0.261338	0.775745	0.542743	0.852817	0.896136	0.030256	0.026822	0.011194	0.012457	0.038917	0.049758
	0.055444	0.04091	0.057252	0.059229	0.50891	0.181076	0.633585	0.527399	0.88193	0.735892	0.028755	0.033906	0.016178	0.011373	0.035993	0.033767
	0.043685	0.084101	0.039335	0.051409	0.677714	0.377988	0.650148	0.702083	0.88894	0.86706	0.031729	0.042761	0.010199	0.011598	0.028972	0.033995
	0.086475	0.118069	0.04477	0.077723	0.416782	0.382638	0.728914	0.868648	0.890065	0.907496	0.029901	0.034375	0.017674	0.015804	0.032378	0.138666
	0.067475	0.103474	0.045417	0.051187	0.629377	0.430353	0.248424	0.704837	0.502946	0.894535	0.031732	0.026849	0.015043	0.01693	0.067379	0.045398
	0.114007	0.104991	0.045523	0.044453	0.433161	0.419198	0.746985	0.524993	0.809717	0.52074	0.031281	0.02319	0.0116	0.01535	0.037468	0.047448
	0.199711	0.135442	0.04875	0.045605	0.342109	0.532665	0.892836	0.750071	0.946272	0.933447	0.033982	0.035198	0.009591	0.018149	0.029511	0.068423
	0.057995	0.091903	0.049288	0.077843	0.187952	0.33636	0.346814	0.778188	0.932723	0.901957	0.031571	0.043295	0.010676	0.012195	0.036629	0.036886
	0.238721	0.205894	0.035861	0.034998	0.472744	0.512152	0.572058	0.82943	0.892991	0.940162	0.034203	0.054286	0.019118	0.012799	0.065496	0.065008
	0.057864	0.192471	0.070352	0.059616	0.353811	0.555469	0.816918	0.766103	0.883894	0.872558	0.030907	0.031221	0.007607	0.019847	0.024399	0.045988
	0.026247	0.122176	0.051135	0.058489	0.257868	0.384507	0.425896	0.774771	0.796734	0.843283	0.031116	0.033135	0.010812	0.012055	0.033021	0.028443
	0.142751	0.051001	0.03493	0.051606	0.334784	0.256783	0.843954	0.771663	0.889837	0.873211	0.032757	0.040194	0.016218	0.011833	0.061595	0.026502
	0.152613	0.048167	0.036783	0.049552	0.343655	0.258466	0.609446	0.539346	0.904147	0.868754	0.029998	0.025348	0.014165	0.027318	0.059407	0.042016
	0.121405	0.060957	0.085521	0.047948	0.61694	0.38908	0.263391	0.801194	0.951307	0.892068	0.031106	0.045681	0.008414	0.018673	0.032401	0.170233
	0.13572	0.128411	0.048691	0.061626	0.326234	0.438177	0.923687	0.771241	0.89928	0.912576	0.032007	0.03353	0.010171	0.011903	0.02932	0.034943
	0.09963	0.085454	0.044836	0.082871	0.404181	0.190771	0.566736	0.898834	0.924733	0.958222	0.032382	0.029186	0.015295	0.012573	0.041484	0.052806
	0.071888	0.065599	0.04199	0.043324	0.488825	0.387115	0.360103	0.717799	0.6638	0.867094	0.034557	0.02434	0.011373	0.020944	0.036285	0.050369
	0.247722	0.204663	0.03669	0.042063	0.812723	0.446684	0.584826	0.718941	0.859765	0.83443	0.034928	0.035603	0.012937	0.022658	0.027668	0.049304
	0.102169	0.027053	0.045348	0.040144	0.429733	0.298838	0.83395	0.712863	0.824571	0.880952	0.024788	0.04074	0.013309	0.018447	0.038943	0.059962
	0.113121	0.083989	0.045226	0.045452	0.359673	0.623434	0.720414	0.35166	0.793707	0.700327	0.029218	0.031841	0.01208	0.023791	0.034117	0.140151
	0.076448	0.064845	0.047418	0.055061	0.253368	0.419886	0.879952	0.56479	0.874067	0.922792	0.01979	0.026581	0.018404	0.013582	0.032083	0.04869
	0.216318	0.05707	0.042595	0.079857	0.453185	0.633089	0.427988	0.613092	0.853504	0.920783	0.024569	0.039144	0.015935	0.014263	0.067205	0.04172
	0.048885	0.095966	0.048972	0.05973	0.328973	0.387911	0.537873	0.820099	0.818577	0.807582	0.040902	0.034522	0.014554	0.012018	0.036317	0.037564
	0.096957	0.356326	0.091212	0.051827	0.315582	0.452107	0.784763	0.638314	0.934348	0.891912	0.028575	0.032646	0.008652	0.020154	0.027667	0.065945
	0.194826	0.090395	0.053886	0.066492	0.588089	0.388175	0.478234	0.65707	0.916075	0.854705	0.031128	0.028955	0.011154	0.01071	0.031716	0.038759
	0.052126	0.089168	0.051695	0.058017	0.332244	0.367651	0.721476	0.74634	0.86238	0.866539	0.036151	0.039434	0.01262	0.010925	0.039432	0.030983
	0.112267	0.308791	0.057721	0.051081	0.545532	0.419221	0.63772	0.894131	0.866115	0.903223	0.029457	0.295516	0.011676	0.028328	0.039019	0.138884
	0.297827	0.044325	0.047483	0.061643	0.4733	0.430265	0.650805	0.567338	0.869918	0.924223	0.044342	0.040984	0.017901	0.021047	0.058278	0.052958
	0.104648	0.207084	0.040483	0.059607	0.343463	0.292329	0.656818	0.759673	0.827857	0.701117	0.039794	0.022209	0.010777	0.016207	0.041767	0.039141
	0.272337	0.243469	0.05325	0.048132	0.549518	0.721482	0.519881	0.325062	0.905963	0.85429	0.080193	0.03753	0.017695	0.017116	0.058985	0.07799
	0.269678	0.190528	0.05984	0.04905	0.514997	0.375857	0.455158	0.860243	0.865721	0.922671	0.047602	0.036191	0.012698	0.016369	0.032267	0.05459
	0.061607	0.119676	0.059989	0.044285	0.209631	0.537674	0.70943	0.718538	0.923198	0.878332	0.031362	0.036876	0.010978	0.027881	0.037746	0.115562
	0.119058	0.086132	0.045137	0.049613	0.525756	0.282613	0.782728	0.904878	0.934014	0.848633	0.032274	0.030128	0.018002	0.015908	0.059939	0.062889
	0.046574	0.078889	0.060152	0.071243	0.333531	0.286612	0.416125	0.683535	0.860849	0.890096	0.033866	0.030309	0.011434	0.013372	0.032689	0.048773
	0.085921	0.248707	0.059128	0.100324	0.229937	0.65794	0.66835	0.511243	0.784352	0.915856	0.029267	0.153924	0.01154	0.011778	0.033557	0.026367
	0.140194	0.050995	0.041927	0.043334	0.531195	0.394075	0.57125	0.732323	0.910149	0.914862	0.039924	0.025307	0.013064	0.013851	0.040734	0.044617
	0.087852	0.038383	0.03864	0.065001	0.401984	0.645888	0.808592	0.463717	0.906301	0.932419	0.029703	0.030697	0.015114	0.01515	0.036078	0.040417
	0.291006	0.199515	0.04546	0.058811	0.618219	0.434809	0.707566	0.613049	0.745806	0.923168	0.026274	0.026715	0.01401	0.01204	0.030644	0.044233
	0.103432	0.113448	0.054859	0.048064	0.548593	0.453502	0.619743	0.632377	0.887823	0.714536	0.03341	0.033957	0.010635	0.013015	0.039367	0.04667
	0.192649	0.150607	0.050723	0.040008	0.319662	0.367652	0.9306	0.634329	0.941366	0.842169	0.033191	0.026184	0.011612	0.014126	0.037036	0.038363
	0.053226	0.074166	0.055555	0.056719	0.256256	0.65859	0.831353	0.772901	0.940359	0.666656	0.029371	0.037321	0.013683	0.013046	0.07576	0.044248
	0.04042	0.24863	0.060121	0.045807	0.584639	0.554753	0.462499	0.617973	0.887383	0.904452	0.028413	0.041778	0.012717	0.024936	0.032778	0.194923
	0.05631	0.075361	0.052705	0.036478	0.500659	0.48954	0.397354	0.857094	0.903986	0.880922	0.039541	0.044565	0.011439	0.020927	0.039516	0.129683
	0.211974	0.070182	0.053164	0.056332	0.481015	0.490348	0.863051	0.749218	0.900011	0.938677	0.04051	0.030567	0.016998	0.011072	0.084301	0.038963
	0.037895	0.041153	0.044025	0.040379	0.38749	0.306005	0.575285	0.266825	0.881516	0.858254	0.02843	0.026586	0.018311	0.01087	0.052115	0.033431
	0.084921	0.079334	0.044252	0.047675	0.386696	0.427311	0.825467	0.514315	0.894473	0.828706	0.023196	0.033053	0.015738	0.0209	0.031169	0.079353
	0.526162	0.106052	0.049942	0.049836	0.624513	0.360429	0.476745	0.809123	0.924402	0.927166	0.037477	0.036641	0.0145	0.032011	0.038569	0.215043
	0.068235	0.311636	0.050073	0.047492	0.692518	0.290011	0.673415	0.921158	0.931371	0.8241	0.025647	0.031998	0.012725	0.012433	0.031911	0.058642
	0.147028	0.150534	0.055685	0.049832	0.488439	0.183417	0.729998	0.718651	0.907345	0.944163	0.035461	0.031023	0.014202	0.012079	0.038985	0.045196
	0.150381	0.094315	0.045307	0.040994	0.417914	0.447273	0.872806	0.873045	0.884606	0.904092	0.033769	0.023919	0.018315	0.014645	0.061404	0.056776
	0.151695	0.061021	0.051431	0.048455	0.508793	0.457142	0.297163	0.604928	0.890746	0.86812	0.029316	0.047476	0.017035	0.01313	0.06675	0.039077
	0.117663	0.029154	0.052519	0.056319	0.435168	0.529695	0.614487	0.466855	0.890652	0.919542	0.028178	0.03299	0.012624	0.011639	0.033633	0.023923
	0.074448	0.123102	0.055368	0.045824	0.380308	0.43832	0.614418	0.8926	0.916723	0.919412	0.031064	0.212159	0.012417	0.025016	0.038954	0.150596
	0.049888	0.288716	0.048537	0.056213	0.274325	0.742512	0.567132	0.501098	0.788507	0.929365	0.036037	0.030373	0.015754	0.01395	0.060053	0.039711
	0.132433	0.1213	0.080484	0.037615	0.571613	0.536978	0.583834	0.652015	0.917966	0.940299	0.026933	0.030313	0.011353	0.013012	0.035494	0.067743
	0.077932	0.625165	0.052236	0.043588	0.428809	0.662659	0.566621	0.899704	0.924456	0.920658	0.03117	0.07547	0.011488	0.025385	0.034046	0.131499
	0.251098	0.08963	0.037257	0.053932	0.589468	0.308908	0.937572	0.616353	0.946255	0.897798	0.028277	0.032231	0.010274	0.023856	0.063157	0.210458
	0.114891	0.194982	0.050623	0.044619	0.338682	0.547629	0.470187	0.511535	0.737405	0.833774	0.028089	0.023763	0.018288	0.013321	0.036036	0.029162
	0.118917	0.278383	0.061047	0.067517	0.602303	0.637186	0.759312	0.324958	0.931397	0.875242	0.040551	0.166122	0.010911	0.008647	0.034275	0.03272
	0.025555	0.059239	0.068242	0.038647	0.646675	0.371331	0.320929	0.822521	0.823599	0.881644	0.020651	0.034016	0.008493	0.014162	0.024195	0.053785
	0.047661	0.099848	0.042979	0.037813	0.334447	0.467127	0.435962	0.431874	0.669973	0.927324	0.034762	0.030138	0.011895	0.016479	0.033668	0.086651
	0.11878	0.131529	0.077509	0.049387	0.182585	0.374742	0.822154	0.625333	0.930789	0.872373	0.020706	0.025776	0.006646	0.014662	0.022311	0.034426
	0.059619	0.235236	0.088716	0.044791	0.432889	0.426334	0.445096	0.853901	0.816403	0.743034	0.045747	0.027299	0.011777	0.012898	0.029566	0.034508
	0.068195	0.52105	0.082848	0.045707	0.350731	0.623156	0.922672	0.54684	0.952451	0.873828	0.021393	0.033516	0.010622	0.017852	0.030011	0.063652
	0.117313	0.220501	0.044253	0.045901	0.478153	0.640656	0.524698	0.568628	0.881734	0.490901	0.03446	0.025209	0.012169	0.01431	0.041971	0.063863
	0.227429	0.240004	0.070294	0.04633	0.472579	0.396985	0.653822	0.918709	0.935226	0.944785	0.033646	0.065426	0.009787	0.011284	0.0223	0.03087
	0.06624	0.168894	0.043283	0.041634	0.443664	0.495719	0.482653	0.66333	0.899107	0.84646	0.025373	0.029197	0.022077	0.036552	0.048857	0.046603
	0.05544	0.048145	0.057513	0.067596	0.230227	0.388887	0.802062	0.553439	0.904189	0.939773	0.025614	0.025137	0.013967	0.014654	0.041503	0.038865
	0.175679	0.088972	0.050036	0.034126	0.432526	0.391107	0.909476	0.843521	0.906747	0.934771	0.095575	0.025648	0.013053	0.009232	0.035325	0.05044
	0.145249	0.131841	0.050442	0.033999	0.555678	0.396814	0.788509	0.840593	0.894936	0.905907	0.033767	0.029959	0.012116	0.014103	0.033829	0.069944
	0.227	0.16436	0.046067	0.05174	0.593136	0.433497	0.640426	0.726591	0.91746	0.909412	0.026072	0.036503	0.009068	0.01479	0.036398	0.070262
	0.272895	0.03189	0.053716	0.042956	0.626101	0.326962	0.494547	0.679816	0.830169	0.891173	0.039804	0.028034	0.017052	0.013117	0.062779	0.056526
	0.142019	0.198539	0.043997	0.05857	0.374427	0.611858	0.842467	0.658367	0.872022	0.922869	0.029335	0.064699	0.014959	0.011378	0.033657	0.036101
	0.063195	0.14326	0.045328	0.044247	0.182396	0.472105	0.675945	0.543486	0.815731	0.899329	0.031504	0.025642	0.010192	0.014835	0.032666	0.057477
	0.201337	0.08579	0.040263	0.055973	0.536098	0.460214	0.897653	0.587356	0.904572	0.848819	0.033536	0.025366	0.014022	0.01236	0.049276	0.060973
	0.216756	0.565581	0.040692	0.038016	0.522488	0.500846	0.393546	0.935407	0.932137	0.94607	0.085693	0.043142	0.012691	0.020933	0.068092	0.062228
	0.093987	0.135321	0.049574	0.056153	0.214872	0.507799	0.859296	0.431226	0.864679	0.672366	0.029487	0.02888	0.013639	0.022573	0.02764	0.046023
	0.035603	0.044077	0.050068	0.055447	0.157035	0.471596	0.498966	0.254508	0.855596	0.891431	0.035039	0.05095	0.011769	0.02398	0.027768	0.196493
	0.373742	0.158667	0.048874	0.050167	0.631001	0.556539	0.500722	0.656314	0.810913	0.930726	0.045465	0.031808	0.012328	0.01405	0.040277	0.040068
	0.042201	0.070434	0.030472	0.052898	0.434417	0.496903	0.322653	0.887147	0.710748	0.908005	0.036179	0.030824	0.014367	0.013894	0.040014	0.062326
	0.131642	0.143222	0.042794	0.046308	0.430096	0.360275	0.676987	0.875876	0.852084	0.891732	0.028321	0.034606	0.017441	0.011258	0.039751	0.042702
	0.040667	0.32735	0.043236	0.049783	0.26055	0.596111	0.719515	0.840694	0.951149	0.927064	0.050923	0.039144	0.011566	0.0178	0.031652	0.063416
	0.055509	0.25618	0.0313	0.039993	0.728876	0.470084	0.857525	0.703019	0.938955	0.663656	0.030071	0.028331	0.021835	0.01406	0.061111	0.052706

## Sheet: Figure1M-N
ID	cg04081153	count	group
TCGA.B7.5818.01A	0.017512	13.6607	high
TCGA.BR.6705.01A	0.0168458	13.2769	high
TCGA.BR.6710.01A	0.0184471	12.0818	high
TCGA.BR.6801.01A	0.0178519	12.7727	high
TCGA.BR.7197.01A	0.0172869	13.728	high
TCGA.BR.7957.01A	0.0169981	14.2487	high
TCGA.BR.8365.01A	0.0183039	13.6828	high
TCGA.BR.8367.01A	0.0176743	13.9745	high
TCGA.BR.8381.01A	0.0186784	13.2524	high
TCGA.BR.8382.01A	0.0181493	11.825	high
TCGA.BR.8483.01A	0.0171162	12.2544	high
TCGA.BR.8486.01A	0.0176955	14.142	high
TCGA.BR.8588.01A	0.021619	13.155	high
TCGA.BR.8589.01A	0.0209331	12.8759	high
TCGA.BR.8591.01A	0.0183112	14.2509	high
TCGA.BR.8592.01A	0.0183151	14.2991	high
TCGA.BR.8676.01A	0.0178004	12.9073	high
TCGA.BR.8677.01A	0.0163692	12.2726	high
TCGA.BR.8678.01A	0.0170353	14.3248	high
TCGA.BR.8679.01A	0.0194431	13.9182	high
TCGA.BR.8680.01A	0.0211439	13.8413	high
TCGA.BR.8683.01A	0.0179013	14.1374	high
TCGA.BR.8686.01A	0.016709	13.0118	high
TCGA.BR.8690.01A	0.0201539	12.1513	high
TCGA.BR.A44T.01A	0.0166312	13.5439	high
TCGA.BR.A44U.01A	0.016479	12.7406	high
TCGA.BR.A4CR.01A	0.0218345	15.1058	high
TCGA.BR.A4CS.01A	0.0183742	13.0812	high
TCGA.CD.5798.01A	0.0209273	12.556	high
TCGA.CD.5799.01A	0.0238564	12.7061	high
TCGA.CD.5801.01A	0.0283275	12.2082	high
TCGA.CD.5803.01A	0.0320109	12.5736	high
TCGA.CD.5813.01A	0.0238657	12.9692	high
TCGA.CD.A486.01A	0.0191178	14.0202	high
TCGA.CD.A487.01A	0.020389	12.9177	high
TCGA.CD.A48A.01A	0.0197549	13.8142	high
TCGA.CD.A48C.01A	0.0192655	12.9794	high
TCGA.CG.5717.01A	0.0199818	13.2435	high
TCGA.CG.5718.01A	0.0205162	13.9416	high
TCGA.CG.5719.01A	0.0278809	12.3123	high
TCGA.CG.5720.01A	0.0217349	13.166	high
TCGA.CG.5721.01A	0.0242083	13.2922	high
TCGA.CG.5722.01A	0.0250156	12.6546	high
TCGA.CG.5723.01A	0.0249356	12.5512	high
TCGA.CG.5724.01A	0.023791	12.0848	high
TCGA.CG.5725.01A	0.0239804	12.8828	high
TCGA.CG.5726.01A	0.017417	12.9733	high
TCGA.CG.5732.01A	0.164571	13.0967	high
TCGA.CG.5734.01A	0.0186725	12.0133	high
TCGA.D7.5577.01A	0.0253852	12.6959	high
TCGA.D7.5578.01A	0.0233094	13.4715	high
TCGA.D7.6815.01A	0.0190153	13.5519	high
TCGA.D7.6822.01A	0.0166982	13.8704	high
TCGA.F1.A448.01A	0.0221551	13.474	high
TCGA.FP.7998.01A	0.0180887	13.916	high
TCGA.FP.8631.01A	0.0208999	12.5696	high
TCGA.HF.7133.01A	0.0163702	13.0452	high
TCGA.HJ.7597.01A	0.0180018	14.1732	high
TCGA.HU.8602.01A	0.0173443	13.2593	high
TCGA.HU.8604.01A	0.0210916	13.0303	high
TCGA.HU.8608.01A	0.0181632	13.6585	high
TCGA.HU.8610.01A	0.0173081	12.9882	high
TCGA.HU.A4G3.01A	0.0233009	13.8652	high
TCGA.HU.A4GF.01A	0.0198767	13.1372	high
TCGA.HU.A4GY.01A	0.016218	14.0439	high
TCGA.IN.A6RS.01A	0.0365516	12.812	high
TCGA.IN.A7NR.01A	0.0273183	11.9947	high
TCGA.IN.A7NT.01A	0.0162069	12.224	high
TCGA.IN.AB1X.01A	0.0184042	14.1049	high
TCGA.IP.7968.01A	0.0170515	14.5343	high
TCGA.R5.A7ZE.01B	0.0225731	12.8815	high
TCGA.R5.A7ZF.01A	0.0226581	12.0701	high
TCGA.R5.A7ZI.01A	0.01693	11.2986	high
TCGA.R5.A7ZR.01A	0.0210474	12.2143	high
TCGA.RD.A8MV.01A	0.0165912	12.9527	high
TCGA.RD.A8N2.01A	0.0177891	13.2744	high
TCGA.RD.A8N6.01A	0.0220771	14.5095	high
TCGA.SW.A7EA.01A	0.0198469	11.8734	high
TCGA.SW.A7EB.01A	0.0209441	12.0637	high
TCGA.VQ.A8DV.01A	0.0200191	13.5094	high
TCGA.VQ.A8DZ.01A	0.0210809	13.9513	high
TCGA.VQ.A8E2.01A	0.0174412	14.9702	high
TCGA.VQ.A922.01A	0.0182882	14.4004	high
TCGA.ZA.A8F6.01A	0.0340631	13.627	high
ID	cg04081153	count	group
TCGA.B7.A5TJ.01A	0.0111355	13.3833	Low
TCGA.B7.A5TK.01A	0.0112838	12.7958	Low
TCGA.BR.6454.01A	0.00923208	12.8311	Low
TCGA.BR.6455.01A	0.0102738	14.391	Low
TCGA.BR.6456.01A	0.0106354	13.3292	Low
TCGA.BR.7196.01A	0.0112584	12.8995	Low
TCGA.BR.7716.01A	0.0107771	14.1411	Low
TCGA.BR.7959.01A	0.0106355	14.2283	Low
TCGA.BR.8058.01A	0.0103476	13.674	Low
TCGA.BR.8077.01A	0.0109948	13.5274	Low
TCGA.BR.8080.01A	0.0109947	13.6034	Low
TCGA.BR.8081.01A	0.0106889	13.8942	Low
TCGA.BR.8284.01A	0.0114876	14.3771	Low
TCGA.BR.8286.01A	0.0103051	13.5913	Low
TCGA.BR.8289.01A	0.0109778	14.1722	Low
TCGA.BR.8291.01A	0.00988503	13.0091	Low
TCGA.BR.8297.01A	0.0107353	13.8975	Low
TCGA.BR.8361.01A	0.0105535	13.2219	Low
TCGA.BR.8364.01A	0.0111942	13.9617	Low
TCGA.BR.8366.01A	0.0105613	13.8329	Low
TCGA.BR.8368.01A	0.010676	14.0129	Low
TCGA.BR.8369.01A	0.0109122	13.9105	Low
TCGA.BR.8371.01A	0.0106938	13.4246	Low
TCGA.BR.8372.01A	0.0113784	12.8558	Low
TCGA.BR.8384.01A	0.011366	13.0229	Low
TCGA.BR.A4IV.01A	0.00760719	14.0386	Low
TCGA.BR.A4J5.01A	0.0112326	13.5684	Low
TCGA.BR.A4J6.01A	0.00963731	13.3323	Low
TCGA.BR.A4J7.01A	0.00925214	13.1317	Low
TCGA.BR.A4J8.01A	0.0105939	13.4155	Low
TCGA.BR.A4J9.01A	0.00955156	13.6119	Low
TCGA.BR.A4PF.01A	0.0113529	14.3682	Low
TCGA.CD.8524.01A	0.0115404	14.1872	Low
TCGA.CD.8526.01A	0.0101922	14.6297	Low
TCGA.CD.8529.01A	0.0105609	13.6986	Low
TCGA.CD.8530.01A	0.0103362	13.9485	Low
TCGA.CD.8533.01A	0.0109108	14.4146	Low
TCGA.CD.8534.01A	0.00973578	13.4451	Low
TCGA.CD.A4MG.01A	0.00925518	13.0627	Low
TCGA.CD.A4MH.01A	0.0113571	13.8609	Low
TCGA.D7.6525.01A	0.0113279	13.5093	Low
TCGA.D7.6528.01A	0.011211	13.5688	Low
TCGA.D7.8574.01A	0.00959125	14.0111	Low
TCGA.D7.8579.01A	0.0111455	13.7361	Low
TCGA.D7.A4YU.01A	0.00978669	14.4905	Low
TCGA.D7.A4YX.01A	0.0112556	13.3811	Low
TCGA.D7.A6F0.01A	0.00906774	14.5313	Low
TCGA.D7.A747.01A	0.0109251	12.1771	Low
TCGA.FP.8209.01A	0.0101707	14.0506	Low
TCGA.HF.7131.01A	0.0109053	13.3059	Low
TCGA.HF.A5NB.01A	0.010199	13.9737	Low
TCGA.HU.8238.01A	0.0110724	12.5563	Low
TCGA.HU.8244.01A	0.0104992	13.5189	Low
TCGA.HU.A4G2.01A	0.0105777	13.7984	Low
TCGA.HU.A4G8.01A	0.0107943	13.373	Low
TCGA.HU.A4GD.01A	0.00864664	12.7112	Low
TCGA.HU.A4GJ.01A	0.00664573	14.4726	Low
TCGA.HU.A4GP.01A	0.0103377	13.5237	Low
TCGA.HU.A4GQ.01A	0.00897894	13.5471	Low
TCGA.HU.A4GT.01A	0.0101518	13.3795	Low
TCGA.HU.A4GU.01A	0.00841443	14.0504	Low
TCGA.HU.A4GX.01A	0.00867037	13.4855	Low
TCGA.HU.A4H0.01A	0.0106222	14.4786	Low
TCGA.HU.A4H2.01A	0.00777205	13.8056	Low
TCGA.HU.A4H3.01A	0.0102471	13.8308	Low
TCGA.HU.A4H4.01A	0.0104237	13.0614	Low
TCGA.HU.A4H5.01A	0.00967444	13.6846	Low
TCGA.HU.A4H6.01A	0.00992176	13.7582	Low
TCGA.HU.A4H8.01A	0.00849326	14.4261	Low
TCGA.HU.A4HB.01A	0.00865194	14.1235	Low
TCGA.IN.A6RI.01A	0.0108122	14.0405	Low
TCGA.IN.A6RJ.01A	0.0107101	12.1586	Low
TCGA.IN.A6RN.01A	0.0113729	11.0701	Low
TCGA.KB.A93H.01A	0.0108705	12.5649	Low
TCGA.MX.A5UJ.01A	0.0106984	13.637	Low
TCGA.VQ.A8E0.01A	0.0100271	13.8573	Low
TCGA.VQ.A8E7.01B	0.0110805	13.7393	Low
TCGA.VQ.A8PJ.01A	0.0114337	14.1863	Low
TCGA.VQ.A8PP.01A	0.0111538	14.1283	Low
TCGA.VQ.A91N.01A	0.0114389	14.2421	Low
TCGA.VQ.A91Y.01A	0.0109608	13.9602	Low
TCGA.VQ.A94U.01A	0.011373	14.0577	Low
TCGA.VQ.AA6G.01A	0.0102645	13.8753	Low
TCGA.VQ.AA6K.01A	0.0112905	13.3545	Low
