# Supplementary material for: Breaking epigenetic shackles: targeting ARID1A methylation and the PI3K/AKT/mTOR-PD-L1 axis to overcome immune escape in gastric cancer
Source: PeerJ. 2025 Nov 6;13:e20251. doi: 10.7717/peerj.20251 (PMC12596888; doi:10.7717/peerj.20251)
Supplement: Supplemental Information 6 [file peerj-13-20251-s006.xlsx]

## Sheet: Sheet1
Figure-5G		ARID1A	β-actin	ARID1A	ARID1A	ARID1A
				ΔCT	ΔΔCT	2(-ΔΔCT)
24h	AGS-dmso	22.7639	13.7492	9.0147	0	1
	AGS-24h	23.0814	13.8335	9.24784	0.233134	0.850785
	AGS-dmso	22.4685	13.7705	8.69804	0	1
	AGS-24h	22.7583	13.797	8.96128	0.26324	0.833215
	AGS-dmso	24.1132	14.3019	9.81133	0	1
	AGS-dmso	23.7736	14.1613	9.61237	-0.198966	1.14788
	AGS-dmso	22.8149	14.673	8.14196	0	1
	AGS-24h	22.0588	14.1125	7.9463	-0.195661	1.14525
	AGS-dmso	22.3071	13.5662	8.74092	0	1
	AGS-dmso	23.5234	14.7104	8.81301	0.0720987	0.951253
48h	AGS-dmso	21.6056	13.4281	8.17752	0	1
	AGS-48h	22.6243	14.1367	8.48758	0.310061	0.806607
	AGS-dmso	22.8149	14.673	8.14196	0	1
	AGS-48h	23.0187	14.5705	8.44821	0.30625	0.808741
	AGS-dmso-48h	22.8149	14.673	8.14196	0	1
	AGS-dmso-48h	22.3154	14.3337	7.98177	-0.160192	1.11744
	AGS-dmso-48h	23.0187	14.5705	8.44821	0.30625	0.808741
	AGS-dmso-48h	21.8735	13.4456	8.42795	0	1
	AGS-48h	22.6581	13.9651	8.69294	0.264995	0.832202
	AGS-48h	22.7188	14.0322	8.68659	0.258646	0.835872
72h	AGS-dmso-72h	21.6056	13.4281	8.17752	0	1
	AGS-72h	22.6564	14.1698	8.48661	0.30909	0.807151
	AGS-dmso-72h	21.6056	13.4281	8.17752	0	1
	AGS-72h	22.6388	14.3254	8.31337	0.135854	0.910131
	AGS-dmso-72h	22.7639	13.7492	9.0147	0	1
	AGS-dmso-72h	25.0312	15.6407	9.39058	0.37588	0.770635
	AGS-72h	23.3149	13.9564	9.35841	0.34371	0.788012
	AGS-dmso-72h	21.8735	13.4456	8.42795	0	1
	AGS-72h	22.7188	14.0322	8.68659	0.258646	0.835872
		ARID1A	β-actin	ARID1A	ARID1A	ARID1A
Figure-5J				ΔCT	ΔΔCT	2(-ΔΔCT)
24h	HGC-27dmso	24.2689	13.7431	10.5258	-2.13163e-14	1
	HGC-27-24h	23.6679	13.9032	9.76472	-0.761118	1.6948
	HGC-27dmso	24.2689	13.7431	10.5258	-2.13163e-14	1
	HGC-27-24h-2	23.3588	13.0798	10.279	-0.246843	1.18
	HGC-27dmso	22.8149	14.673	8.14196	0	1
	HGC-27-24h-3	22.366	14.516	7.85002	-0.291949	1.22429
48h	HGC-27dmso	24.2689	13.7431	10.5258	-2.13163e-14	1
	HGC-27-48h-1	23.3342	14.5003	8.83396	-1.69188	3.23077
	HGC-27dmso	23.9173	13.3555	10.5618	0	1
	HGC-27-48h-2	22.3569	13.6538	8.70304	-1.85874	3.6269
	HGC-27dmso	24.067	13.6463	10.4207	0	1
	HGC-27-48h-3	23.2702	14.4532	8.817	-1.60613	3.04435
	HGC-27-48h-4	23.5234	14.7104	8.81301	-1.61012	3.05277
72h	HGC-27dmso	24.067	13.6463	10.4207	0	1
	HGC-27-72h-1	23.2306	14.0615	9.16915	-1.25398	2.38499
	HGC-27-72h-2	22.2489	12.9003	9.34866	-1.07448	2.10596
	HGC-27-72h-3	23.0326	13.8308	9.20185	-1.22129	2.33154
	HGC-27-72h-4	22.8716	13.5799	9.29165	-1.13148	2.19084
	HGC-27dmso	23.906	13.7414	10.1646	0	1
	HGC-27-72h-4	13.6689	22.6197	8.95086	-1.21373	2.31936
Figure-6C
		ARID1A	β-actin	ARID1A	ARID1A	ARID1A
				ΔCT	ΔΔCT	2(-ΔΔCT)
	AGSNC	21.6056	13.4281	8.17752	0	1
	AGS54	23.1038	13.6865	9.41733	1.23981	0.423429
	AGSNC	22.0582	13.8058	8.25243	0	1
	AGS54	23.1832	13.8058	9.37744	1.12502	0.458497
	AGS-NC	21.991	14.3873	7.60369	0	1
	AGS-54	22.8756	13.8459	9.02974	1.42605	0.372148
Figure-6D				ARID1A	ARID1A	ARID1A
		ARID1A	β-actin	ΔCT	ΔΔCT	2(-ΔΔCT)
	HGC27-NC	23.2386	13.8266	9.41199	0	1
	HGC27-77	24.302	14.3368	9.96519	0.553205	0.681504
		ARID1A	β-actin	ARID1A	ARID1A	ARID1A
				ΔCT	ΔΔCT	2(-ΔΔCT)
	hgc27-NC	22.3071	13.5662	8.74092	0	1
	HGC27-77	23.3622	13.9707	9.39157	0.650656	0.636991
				ARID1A	ARID1A	ARID1A
		ARID1A	β-actin	ΔCT	ΔΔCT	2(-ΔΔCT)
	hgc-27nc	22.4685	13.7705	8.69804	0	1
	HGC-27	23.1076	13.8779	9.22968	0.531647	0.691765
